1 **Title**

2 ***DRT111/SFPS* splicing factor controls ABA sensitivity in *Arabidopsis* seed development and**  
3 ***germination***

4 **Short title**

5 **Functional analysis of DRT111**

6 **One Sentence Summary**

7 ***Arabidopsis* splicing factor *DRT111/SFPS* is required for ABA-mediated responses in seeds**

8 Paola Punzo, Alessandra Ruggiero, Marco Possenti, Giorgio Perrella, Roberta Nurcato, Antonello  
9 Costa, Giorgio Morelli, Stefania Grillo and Giorgia Batelli

10 National Research Council of Italy, Institute of Biosciences and Bioresources (CNR-IBBR), Via  
11 Università 133, Portici (NA), Italy (P.P., A.R., R.N., A.C., S.G., G.B.); Research Centre for  
12 Genomics and Bioinformatics, Council for Agricultural Research and Economics (CREA-GB) , Via  
13 Ardeatina 546, 00178 Rome, Italy (M.P., G.M.); ENEA Italian National Agency for New  
14 Technologies, Energy and Sustainable Economic Development, Trisaia Research Center, S.S. 106  
15 Ionica, km 419+500 - 75026 Rotondella (MT), Italy (G.P.).

16 **Keywords:**

17 *Arabidopsis thaliana*, pre-mRNA splicing, abscisic acid, light signaling, seed germination,  
18 transcriptomics

19 **Corresponding Author:**

20 Dr. Giorgia Batelli

21 e-mail: [giorgia.batelli@ibbr.cnr.it](mailto:giorgia.batelli@ibbr.cnr.it)

22

23 **List of Author Contributions**

24 P.P. performed most of the experiments and analysed the data; A.R., R.N., M.P., G.P performed  
25 experiments, acquired, and interpreted experimental results; A.C. supervised the experiments; S.G.  
26 supervised the research and complemented the writing; G.B. and G.M. conceived the project,  
27 designed the experiments and analysed the data; P.P. and G.B. wrote the article with contributions  
28 from all the authors.

29 **Abstract**

30 RNA splicing is a fundamental mechanism contributing to the definition of the cellular protein  
31 population in any given environmental condition. DRT111/SFPS is a splicing factor previously  
32 shown to interact with phytochromeB and characterized for its role in splicing of pre-mRNAs  
33 involved in photomorphogenesis. Here, we show that DRT111 interacts with Arabidopsis Splicing  
34 Factor 1 (SF1), involved in 3' splicing site recognition. Double and triple mutant analysis shows  
35 that DRT111 controls splicing of *ABI3* and acts upstream of the splicing factor SUPPRESSOR OF  
36 *ABI3-5* (SUA). *DRT111* is highly expressed in seeds and stomata of *Arabidopsis* and is induced by  
37 long-term treatments with polyethylene glycol and ABA. *DRT111* knock-out mutants are defective  
38 in ABA-induced stomatal closure and are hypersensitive to ABA during seed germination.  
39 Conversely, *DRT111* over-expressing plants show ABA hyposensitive seed germination. RNAseq  
40 experiments show that in dry seeds, *DRT111* controls expression and splicing of genes involved in  
41 response to osmotic stress and ABA, light signaling and mRNA splicing, including targets of  
42 ABSCISIC ACID INSENSITIVE3 (*ABI3*) and PHYTOCHROME INTERACTING FACTORS  
43 (PIFs). Consistently, expression of the germination inhibitor *SOMNUS*, induced by *ABI3* and *PIF1*  
44 is up-regulated in imbibed seeds of *drt111-2* mutants. Altogether, these results indicate that  
45 *DRT111* controls sensitivity to abscisic acid (ABA) during seed development, germination and  
46 stomatal movements and constitutes a point of integration of the ABA- and light-regulated  
47 pathways to control seed germination.

48

49

50

## 51 **Introduction**

52 The phytohormone abscisic acid (ABA) regulates physiological and developmental processes,  
53 including stress responses, seed development and germination.

54 Perhaps the most well defined mechanism mediated by ABA is induction of stomatal closure.

55 In plants subjected to hyperosmotic stress, ABA is synthesized predominantly in leaf vascular  
56 tissues and guard cells. Here, ABA activates a signalling pathway that coordinately modulates  
57 activity of membrane located transporters, leading to efflux of solutes. The consequent reduction of  
58 turgor of guard cells causes stomatal closure, thus reducing evapotranspiration in abiotic stress  
59 conditions (Bauer et al., 2013; Kuromori et al., 2018; Nambara and Marion-Poll, 2005; Qin and  
60 Zeevaart, 1999; Schroeder et al., 2001).

61 In seeds, ABA induces maturation, dormancy and plays a key role during germination.  
62 Transcription factors such as LEAFY COTYLEDON1 and 2 (LEC1 and LEC2), FUSCA3 (FUS3)  
63 and ABSCISIC ACID INSENSITIVE3 (ABI3) are involved in reserve accumulation and inhibition  
64 of premature germination (Santos-Mendoza et al., 2008, Monke et al., 2012, Yan and Zhen, 2017).  
65 At early stages of seed maturation, *LEC1/2* and *FUS3* are expressed to prevent germination of the  
66 developing embryo, whereas *ABI3* expression is maintained at high levels until final maturation  
67 stages (Perruc et al., 2007). In this phase, *ABI3* and *LEC1* regulate expression of genes involved in  
68 storage reserve accumulation and acquisition of desiccation tolerance, such as late embryogenesis  
69 abundant (LEA) proteins (Parcy et al., 1994).

70 In addition, ABA prevents germination by inhibiting water uptake and endosperm rupture (Finch-  
71 Savage and Leubner-Metzger, 2006). When favourable conditions are restored, abscisic acid levels  
72 decrease, with a concomitant increase of gibberellic acid (GA) to allow embryos to expand and  
73 break the seed covering layers (Manz et al., 2005). The endogenous levels of ABA and GA are  
74 regulated by different signalling pathways, and recent studies highlighted the crosstalk between  
75 light and hormonal pathways in the regulation of germination (Kim et al., 2008; Lau and Deng,  
76 2010; de Wit et al., 2016). Phytochrome A (phyA) and phyB are photoreceptors which perceive Far  
77 Red (FR) and Red (R) light, respectively. Early during germination, phyB signalling involves a  
78 family of basic helix-loop-helix TFs, the PHYTOCHROME INTERACTING FACTORS (PIFs).  
79 After R or white light illumination, phyB translocates to the nucleus in its active Pfr conformation,  
80 where it binds and inhibits PIF1, also known as PIF3-LIKE 5 (PIL5), promoting light-induced  
81 germination (Lee et al., 2012). In the dark, or in low R/FR ratio light, when phyB is in the inactive,  
82 Pr cytosolic form, PIF1 is stabilized and represses germination. PIF1 promotes ABA biosynthesis  
83 and signalling, and represses GA signalling, inducing expression of genes such as *ABI3*, *ABI5*,  
84 *REPRESSOR OF GA1-3 (RGA)*, *DOF AFFECTING GERMINATION 1 (DAG1)* (Oh et al., 2009).

85 Interestingly, *ABI3* protein also interacts with PIF1 to activate the expression of direct targets, such  
86 as *SOMNUS* (*SOM*), a key regulator of light-dependent seed germination acting on ABA and GA  
87 biosynthetic genes (Kim et al., 2008; Park et al., 2011).

88 In seeds initiating germination, *ABI3* expression is repressed. Perruc and colleagues (2007) reported  
89 that the chromatin-remodeling factor PICKLE negatively regulates *ABI3* by promoting silencing of  
90 its chromatin during seed germination. *ABI3* activity is also controlled by alternative splicing of the  
91 corresponding precursor mRNA (pre-mRNA), with different splice forms predominating at  
92 different seed developmental stages. This process is regulated by splicing factor SUPPRESSOR OF  
93 *ABI3-5* (*SUA*) through the splicing of a cryptic intron in *ABI3* mRNA (Sugliani et al., 2010).

94 Alternative splicing occurs when the spliceosome differentially recognizes the splice sites. The  
95 selection of alternative 5'SS or 3'SS leads to an inclusion of different parts of an exon, whereas  
96 failure to recognize splicing sites causes intron retention in the mature mRNA. These alternative  
97 splice forms can produce proteins with altered domains and function (Staiger and Brown, 2013;  
98 Laloum et al., 2018; Nilsen and Brenton Graveley, 2010, Fu and Ares, 2014). In plants, this  
99 mechanism is highly induced in response to external stimuli. Recent studies reported an emerging  
100 link between splicing and ABA signalling (Zhu et al., 2017; Laloum et al., 2018). For example, the  
101 transcript encoding type 2C phosphatase HYPERSENSITIVE TO ABA 1 (*HAB1*), a negative  
102 regulator of ABA signalling, undergoes alternative splicing. In the presence of ABA, the last intron  
103 is retained, leading to a truncated protein. The two encoded proteins, *HAB1-1* and *HAB1-2*, play  
104 opposite roles by competing for interaction with OPEN STOMATA 1 (*OST1*) during germination,  
105 which then results in switching of the ABA signalling on and off (Wang et al., 2015). Likewise,  
106 *SR45*, a member of serine/arginine-rich proteins, an important class of essential splicing factors that  
107 influence splice site selection, regulates glucose signalling through downregulation of ABA  
108 pathway during seedling development (Carvalho et al., 2010). In addition, several splicing  
109 regulators were reported to influence ABA sensitivity, such as *SAD1*, *ABH1*, *SKB1*, *Sfl* (Xiong et  
110 al., 2001; Hugouvieux, et al. 2001; Zhang et al., 2011; Jang et al. 2014).

111 In this study we show that the splicing factor DNA-DAMAGE REPAIR/TOLERATION PROTEIN  
112 111 (*DRT111*), previously characterized in the control of pre-mRNA splicing in light-regulated  
113 developmental processes (Xin et al., 2017), is involved in ABA response mechanisms.  
114 Manipulation of *DRT111* expression results in a modified sensitivity to ABA of stomatal  
115 movements and during seed germination. Accordingly, *DRT111* is highly expressed in stomata and  
116 seeds, and up-regulated upon long-term exposure to ABA. Moreover, *ABI3* alternative transcript  
117 quantification as well as analysis of double and triple mutants shows that *DRT111* controls splicing  
118 of *ABI3* upstream of *SUA*. Transcriptome analysis in *drt111* dry seeds revealed extensive alteration

119 in gene expression and splicing of genes involved in light and ABA-dependent control of  
120 germination. Consistently, we show that expression of the germination inhibitor *SOM* is induced in  
121 *drt111*. Taken together, our results suggest that integration of ABA and light quality stimuli for  
122 seed germination under appropriate conditions requires DRT111.

123

## 124 **Results**

### 125 ***DRT111 expression is high in seeds and guard cells and is induced by long-term stress***

126 Using RNA transcriptome data from potato cells adapted to gradually increasing concentrations of  
127 polyethylene glycol (PEG) we identified Arabidopsis orthologous genes, and functionally analysed  
128 their role in responses to ABA and osmotic stress (Ambrosone et al., 2015, 2017; Punzo et al.,  
129 2018). Following the same rationale, we focused on a DNA-damage-repair/toleration protein coding  
130 gene (EST617924, GenBank accession no. BQ510509, corresponding to  
131 PGSC0003DMT400054608, Potato genome sequencing consortium, 2011), up-regulated in adapted  
132 cells (Ambrosone et al., 2017). The protein deduced from PGSC0003DMT400054608 shared 64%  
133 sequence identity with Arabidopsis At1g30480, encoding a predicted splicing factor (also referred  
134 to as DRT111/ RSN2/SFPS, SPF45-related, Pang et al., 1993; Xin et al., 2017; Zhang et al., 2014,  
135 Supplemental Figure S1).

136 To verify the expression pattern in Arabidopsis, we mined public databases (eFP platform, Winter  
137 et al., 2007), showing that *DRT111* is ubiquitously expressed throughout development, with highest  
138 transcript abundance in dry seeds (Fig. 1A). In addition, histochemical analysis of stable  
139 Arabidopsis lines expressing  $\beta$ -glucuronidase (GUS) under the control of the *DRT111* promoter  
140 visualized GUS activity in cells surrounding the base of trichomes and guard cells (Fig. 1B).

141 When assessing responsiveness of *DRT111* in seedlings exposed to short- or long-term treatments  
142 with NaCl, abscisic acid (ABA) or PEG, we detected a significant up-regulation of *DRT111* only  
143 after long-term treatments, while 3, 6 or 9h treatments did not result in major changes of *DRT111*  
144 transcript abundance. In particular, an increase higher than 2-fold was observed after 5-days  
145 treatments with ABA or PEG (Fig. 1C-D). Taken together, the results show that *DRT111* is highly  
146 expressed in seeds and guard cells, and that a higher steady state mRNA level is determined by  
147 long-term exposure to ABA or osmotic stress.

148 *DRT111/SFPS* encodes a nuclear-localized potential orthologue of human splicing factor  
149 *RBM17/SPF45* (Supplemental Figure S2, Xin et al., 2017), shown to interact with Splicing factor 1  
150 (SF1), a protein involved in early pre-spliceosome assembly (Crisci et al., 2015; Hegele et al., 2012).  
151 Therefore, we verified if this interaction is conserved in Arabidopsis. Using the yeast two hybrid  
152 system, we tested different portions of SF1, and showed interaction between DRT111 and the C-

153 terminal fragment (1398-2415) of SF1 (Fig 2A), while a fusion of the GAL4 binding domain (BD)  
154 with the SF1 N-terminal fragment (1-1396) resulted in auto-activation when co-transformed with  
155 the empty AD vector in yeast. We used a split reporter system to confirm the interaction *in planta*.  
156 A reconstituted YFP signal was detected in nuclear speckles, indicating that DRT111 forms a  
157 complex with SF1 and may thus act at early steps of the spliceosome machinery (Fig 2B).

158

### 159 ***Altered DRT111 expression affects plant growth and stomatal responsiveness to ABA***

160 To analyse the involvement of DRT11 in ABA-related processes, insertion mutants were identified  
161 within the TAIR collection and transgenic plants over-expressing DRT111 were produced (Fig.  
162 S3A-C). Three over-expressing (OX) lines carrying homozygous, single-copy transgene insertions  
163 and expressing the transcript were selected (Fig. S3C). Phenotype observation in control conditions  
164 and after ABA treatment indicated that over-expression of *DRT111* caused a limited increase in  
165 primary root length (Fig. 3A), while lack of *DRT111* expression resulted in early flowering, as  
166 previously reported (Fig. S3D, Xin et al., 2017).

167 As *DRT111* is highly expressed in guard cells (Fig. 1B), we evaluated the transpirational water loss  
168 and its relation to stomatal movements in plants with altered expression of *DRT111*. First, we  
169 measured the fresh weight reduction of detached leaves during six hours (Verslues et al., 2006).  
170 Whereas the OX and wild-type plants showed similar trends, we observed a significant increase in  
171 the transpirational water loss in knockout plants, with a loss of 44% and 46% of their initial fresh  
172 weight for *drt111-1* and *drt111-2*, respectively compared to 33% of Col-0 after 6 hours (Figure 3B).  
173 Thus, we analyzed the stomatal movements in *drt111* plants compared to wild type after treatments  
174 with abscisic acid, which plays a central role in stomatal closure (Figure 3C-D). Consistent with the  
175 water loss analysis, significant differences in stomatal pore size were observed between genotypes  
176 after 2.5h ABA treatments (50 $\mu$ M). While the ABA-induced stomatal closure was observed in Col-  
177 0 leaves (ratio 0.64 width/length of pore, corresponding to 8.5 % reduction of the pore size),  
178 stomata of the mutants did not respond to the ABA treatment (*drt111-1*) or had a strikingly reduced  
179 response (*drt111-2*, ratio 0.72 width/length of pore, corresponding to 2.2% reduction compared to  
180 untreated stomata), suggesting that stomatal responsiveness to ABA is impaired in *drt111* mutants  
181 causing a significant water loss over time.

182

### 183 ***drt111 seeds are hypersensitive to ABA during germination***

184 Since *DRT111* is an ABA-responsive gene highly expressed in seeds (Fig.1A), we analysed seed  
185 germination of mutants and over-expressing lines in presence of ABA. As indicated in Fig. 4, seeds

186 collected from *drt111-1* and *drt111-2* were hypersensitive to ABA in terms of radicle emergence  
187 and cotyledon expansion, while OX lines displayed an increased seed germination in presence of  
188 ABA compared to wild type. In particular, after 3 days 77% of Col-0 seeds were germinated on 0.5  
189  $\mu$ M ABA, compared to 96, 93 and 93% of FLAG-DRT111 #2, #4 and #21, respectively and 53,  
190 57% in *drt111-1* and *drt111-2* (Fig. 4A-C). An ABA response curve of 12 months after-ripened  
191 seeds indicated that the hypersensitivity at high concentrations of ABA of the *drt111* mutants was  
192 retained after long periods of dry storage (Fig. 4D). Complementation experiments of *drt111* with  
193 *DRT111* driven by the endogenous promoter, indicate that the hypersensitivity to ABA of knockout  
194 *drt111-1* and *drt111-2* can be reverted by introducing a functional *DRT111* copy, thus confirming  
195 that mutant phenotype is caused by lack of functional *DRT111* (Fig. 4E).

196

### 197 ***DRT111 regulates gene expression and mRNA splicing***

198 To further characterize the role of *DRT111* in seed germination, we examined the transcriptome of  
199 *drt111* dry seeds. RNA-seq analysis highlighted a major role of *DRT111* in the regulation of gene  
200 expression with over 3000 differentially expressed genes ( $|\log_2(\text{fold-change})| > 0.21$ , FDR  $< 0.05$ ),  
201 equally distributed among down- (1941 genes) and up-regulated (1834) genes (Supplemental  
202 Dataset 1). Validation of a subset of genes by qRT-PCR showed high correlation with the fold  
203 change detected by RNA-seq (Supplemental Figure S4C-D).

204 Consistent with the observed phenotype, gene ontology (GO) enriched categories included seed  
205 related processes (seed germination, embryo development ending in seed dormancy, post-  
206 embryonic development), response to abiotic stress (response to salt stress, response to cold,  
207 response to water deprivation, response to heat, regulation of stomatal movement, hyperosmotic  
208 salinity response, response to osmotic stress), in the ABA signalling pathway (response to abscisic  
209 acid, abscisic acid-activated signaling pathway,) as well as the processing of mRNAs (mRNA  
210 processing, RNA splicing) (Supplemental Dataset S1, Figure S4A-B).

211 Among the genes differentially expressed in *drt111-2*, components of the light perception/signalling  
212 cascade were present, including Phytochromes (Phy) and PHYTOCHROME INTERACTING  
213 FACTORS (PIF), some of which up-regulated (*PhyA*, *PIF1/PIL5* and *PIF6/PIL2*) and others down-  
214 regulated (*PhyE*, *PhyD* and *PIF7*) (Supplemental Dataset S1).

215 Significantly upregulated genes in *drt111-2* included several members of the homeodomain leucine  
216 zipper class I TF (*ATHB-1*, *ATHB-5*, *ATHB-7*, *ATHB-12*), which regulate abiotic stress responses.

217 To investigate the impact of lack of *DRT111* on pre-mRNA splicing, we explored differences in  
218 splicing events between *drt111-2* and Col-0. Using the MATS (Multivariate Analysis of Transcript  
219 Splicing) software, we analyzed all major types of splicing events, such as exon skipping (ES),

220 alternative 5' or 3' splice site (A5SS; A3SS), mutually exclusive exon (MXE) and intron retention  
221 (IR). All the analyzed events were affected in *drt111-2* seeds. We identified a total of 611  
222 differential splicing events, corresponding to 485 genes between mutant and wild type. Among  
223 these, A3SS and IR were the most represented categories, with 161 and 258 events respectively (Fig  
224 5A-B, Supplementl Dataset S2). Interestingly, gene ontology enrichment analysis (GOEA) showed  
225 that categories related to germination mechanisms (such as response to abscisic acid, positive  
226 regulation of seed germination, abscisic acid biosynthetic process, maintenance of seed dormancy  
227 by absisic acid, regulation of seed germination, embryo sac egg cell differentiation) or to mRNA  
228 metabolism (such as mRNA splicing via spliceosome, mRNA processing, RNA splicing, mRNA  
229 stabilization) were significantly enriched among the IR and A3SS defects in *drt111-2*.  
230 (Supplemental Dataset S3), suggesting that DRT11 may control the splicing of specific mRNAs in  
231 seeds. We validated the splicing events identified through RNA-seq and reported as reads mapped  
232 in gene regions in Col-0 and *drt111-2* mutant (Fig 5C, E, G and I) by qRT-PCR analysis (Fig 5D, F,  
233 H and J).

234

### 235 ***DRT111 regulates ABI3 splicing***

236 We have shown that *drt111* mutants are hypersensitive to ABA in the germination process (Fig. 4).  
237 One of the key players determining sensitivity to ABA at the seed stage, and whose activity is  
238 regulated by alternative splicing, is the transcription factor ABI3 (Sugliani et al., 2010). The *ABI3*  
239 locus gives rise to two alternative transcripts, *ABI3- $\alpha$*  and *ABI3- $\beta$*  which differ by the presence or  
240 cleavage of a cryptic intron, respectively. *ABI3- $\alpha$*  produces a full length, functional protein and is  
241 highly expressed during seed development, while *ABI3- $\beta$* , encodes a truncated protein lacking two  
242 of the four ABI3 conserved domains, and accumulates at the end of seed maturation (Sugliani et al.,  
243 2010).

244 Although splicing of *ABI3* was not identified as affected in *drt111-2* through RNAseq, comparison  
245 of the DEGs with a list of 98 *ABI3* targets (Monke et al., 2012) showed that 51 of these genes were  
246 deregulated in *drt111-2* (Supplemental Table S1), suggesting that *ABI3* might be a target of  
247 *DRT111*.

248 Therefore, we used qRT-PCR to quantify the amount of *ABI3- $\alpha$*  and *ABI3- $\beta$*  in *drt111-2* dry and  
249 imbibed seeds compared to wild type using primers described by Sugliani and colleagues (2010).  
250 Although the level of *ABI3- $\alpha$*  is similar in dry seeds, accumulation of *ABI3- $\beta$*  is significantly higher  
251 in *drt111-2* than Col-0; in addition, in imbibed seeds, both transcripts were upregulated in *drt111-2*,  
252 with *ABI3- $\beta$*  showing a 4-fold induction compared to Col-0 (Fig. 6A), demonstrating a defective  
253 regulation of *ABI3* splicing in plants lacking *DRT111*.



254 To confirm this observation genetically, we took advantage of the *abi3-5* mutant allele (Ooms et al.,  
255 1993). Due to a frameshift mutation, the *abi3-5- $\alpha$*  transcript contains a premature stop codon, while  
256 *abi3-5- $\beta$*  encodes a functional ABI3 protein, therefore an increase in accumulation of *abi3-5- $\beta$*   
257 results in a higher amount of functional ABI3 (Sugliani et al. 2010). Thus, an increased efficiency  
258 in splicing of the cryptic intron is expected to alleviate *abi3-5* phenotypes, including ABA  
259 insensitivity during germination and reduced seed longevity (Bies-Etheve et al., 1999).  
260 We thus produced double mutants *drt111-2/abi3-5* to verify reversion of the *abi3-5* phenotypes.  
261 Germination tests showed increased sensitivity to ABA and improved longevity of *drt111-2/abi3-5*  
262 as compared to *abi3-5*. In the presence of 10 $\mu$ M ABA, 20% of *drt111-2/abi3-5* seeds were able to  
263 germinate compared to 100% in *abi3-5* (Fig 6B). Also the severe reduction of longevity observed in  
264 *abi3-5* seeds was restored in *drt111-2/abi3-5*, with 90% of seeds germinated 8 weeks after harvest  
265 (Fig 6C), compared to 0% *abi3-5*. Altogether, these results show that mutations in *DRT111* rescue  
266 the *abi3-5* mutation, with knock-out mutations showing a higher efficiency of phenotype reversion.  
267 Since the alternative splicing of *ABI3* is also controlled by the splicing factor SUPPRESSOR OF  
268 *ABI3-5* (*SUA*, Sugliani et al., 2010), we verified genetic interaction between *DRT111* and *SUA* by  
269 the analysis of the double mutants *drt111-2/sua-2*. As shown in Figure 7, seed germination on 0.5  
270  $\mu$ M ABA of *drt111-2/sua-2* was 96%, compared to 20% of *drt111-2* and 91% of *sua-2*. Thus, these  
271 results indicate that *SUA* is epistatic to *DRT111* and that *DRT111* acts upstream of *SUA* (Figure 6D).  
272 Accordingly, germination of *drt111-2/sua-2/abi3-5* triple mutant did not show additive effects  
273 compared to *drt111-2/abi3-5* or *sua-2/abi3-5* double mutants. Germination of the triple mutant on  
274 higher ABA concentrations largely resembled that of double mutants, with 17% *drt111-2/sua-2/abi3-5*  
275 seeds germinated on 10 $\mu$ M ABA compared to 20% *drt111-2/abi3-5* and 18% *sua-2/abi3-5*,  
276 indicating that control of *ABI3* splicing by *DRT111* and *SUA* is exerted through the same pathway  
277 (Figure 6E).

278

### 279 ***Expression of SOMNUS is affected in drt111***

280 In imbibed seeds, ABI3 and PIL5/PIF1 collaboratively activate the expression of the germination  
281 inhibitor *SOMNUS* (*SOM*, Park et al., 2011), whereas R or white light repress it through the action  
282 of PhyB. Since *DRT111* controls splicing of *ABI3*, and is epistatic to *PIFs* (Xin et al., 2017), we  
283 verified expression of *SOM* in imbibed seeds of *drt111-2*. As shown in Fig. 6F, expression of  
284 *SOMNUS* was 2.49-fold higher in *drt111-2* compared to wild-type Col-0, indicating that a higher  
285 expression of *SOM* might contribute to the observed ABA hypersensitivity in *drt111* seeds.  
286 Consistently, *pil5/pif1* and the quadruple *pif1/pif3/pif4/pif5* mutant (*pifq*) are insensitive to ABA in  
287 seed germination (Supplemental Figure S5 B-C; Oh et al., 2009; Lee et al., 2012). Finally, we also

288 find that the *phyB* mutant is hypersensitive to ABA in the germination process (Fig S5A). Again,  
289 this could be partly due to the lack of negative regulation of SOM acting as a positive regulator of  
290 ABA biosynthesis (Kim et al., 2008).

291

## 292 **Discussion**

293 Alternative splicing and its regulation are involved in several adaptation processes in response to  
294 environmental stimuli and stresses (Laloum et al., 2018). Here, we have shown that the Arabidopsis  
295 *DRT111* gene, encoding a protein orthologous to the human splicing factor SPF45 (Xin et al., 2017),  
296 is highly expressed in dry seeds, stomata and in seedlings experiencing long-term osmotic stress.  
297 Functional studies in Arabidopsis established that DRT111 controls stomatal movements and seed  
298 germination in response to ABA.

299 The human splicing factor SPF45 forms a complex with SF1 and U2AF<sup>65</sup> for the selection of  
300 alternative 3' splice sites (Lallena et al. 2002). During early spliceosome assembly, the U2AF<sup>65</sup>  
301 interact with U2AF<sup>35</sup> and SF1 to promote U2snRNP detection of the pre-mRNA 3' splice site (Park  
302 et al., 2017).

303 Here we have shown that DRT111 physically interacts with SF1, while, in a previous independent  
304 study, interaction and colocalization with U2AF<sup>65</sup> was reported (Xin et al., 2017). Based on  
305 homology with yeast and metazoan proteins, plant SF1 may be involved in recognition of intron  
306 branching point and assist in 3' splice site selection (Jiang et al., 2014; Lee et al., 2017). Together  
307 with the observation that the highest number of the observed splicing defects concerned IR and  
308 A3SS, the protein interactions suggest that DRT111 is also involved in the early steps of  
309 spliceosome formation, which concern intron branch point recognition and 3' splicing site selection  
310 by U2AF and SF1. However the mode of participation of DRT111 (e.g. promotion and/or  
311 suppression) in this complex remains to be established.

312

313 A growing body of evidence indicates that in plants components of the pre-mRNA splicing  
314 machinery modulate responses to ABA and abiotic/biotic stresses (Xiong et al., 2001; Cui et al.,  
315 2014; Carrasco-Lopez et al., 2017). Arabidopsis *sf1* mutants show several developmental defects,  
316 including dwarfism, early flowering and hypersensitivity to ABA at seed germination stage (Jiang  
317 et al., 2014).

318 Previously, *DRT111* and SUPPRESSOR OF ABI3-5 (SUA) were identified in a suppressor screen  
319 of *snc4-1d*, mutated in a receptor like kinase involved in bacterial pathogen resistance (Zhang et al.,  
320 2014). A similar pattern of intron retention in *SNC4* and *CERK1* was reported in both *sua* and

321 *drt111* plants, thus suggesting that *SUA* and *DRT111* are both required for the splicing of at least  
322 these two genes (Zhang et al., 2014).

323 Here, we have shown that *DRT111* knock-out and over-expressing plants are impaired in ABA seed  
324 germination responses, in analogy to *sua* mutants (Sugliani et al., 2010). In particular, *SUA* controls  
325 the activity of *ABI3* by suppressing the splicing of an *ABI3* cryptic intron to reduce the levels of  
326 functional *ABI3* in mature seeds (Sugliani et al., 2010). Because the *ABI3* cryptic intron is part of a  
327 protein-coding exon, it was subsequently classified as an exitron, an alternatively spliced internal  
328 region of a protein-coding exon (Marquez et al., 2015). Exitron splicing (EIS) is suggested to be a  
329 mechanism to increase plant proteome diversity in specific developmental stages or stress  
330 conditions, to affect protein functionality by modifying intracellular localization, presence of  
331 protein domains and post-translational modification sites, such as phosphorylation, sumoylation,  
332 ubiquitylation (Marquez et al., 2015). Based on EIS patterns in *sua* mutants, and presence of  
333 RBM5/*SUA* predicted binding sites enrichment in exitrons, *SUA* appears to have a general role in  
334 preventing exitron splicing (Marquez et al., 2015).

335 Here, we have shown that *DRT111*, similarly to *SUA*, suppresses splicing of *ABI3*; accordingly,  
336 known *ABI3* targets (Monke et al., 2012) were found differentially expressed in *drt111* compared to  
337 wild type. Interestingly, *sua* mutants in Columbia background are insensitive to ABA in seed  
338 germination (Sugliani et al., 2010), whereas *DRT111* knock-out causes ABA hypersensitivity. The  
339 phenotype in *drt111* may be explained by the observed increase in total *ABI3* amount, determined in  
340 imbibed seeds by an increase of both the  $\alpha$  and the  $\beta$  transcripts. In particular, a 4-fold accumulation  
341 of *ABI3*- $\beta$ , corresponding to the transcript in which the exitron is spliced out, accounts for most of  
342 *ABI3* transcript in *drt111-2*. Therefore, the different ratio between the *ABI3*- $\alpha$  and *ABI3*- $\beta$   
343 transcripts, and their products thereof, may be important to define seed ABA sensitivity.

344 Both *sua/abi3-5* or *drt111-2/abi3-5* in Columbia background partially rescue seed developmental  
345 and ABA sensitivity defects of *abi3-5*. Thus, similarly to mammalian systems, *SUA* and *DRT111*  
346 may control splicing of the same substrates with different timing. Further analyses will verify if  
347 *DRT111* also controls exitron splicing mechanism.

348  
349 *DRT111/SFPS* was recently shown to regulate development in response to light through interaction  
350 with phyB and REDUCED RED-LIGHT RESPONSES IN CRY1CRY2 BACKGROUND 1 (*RRC1*,  
351 Xin et al., 2017, Xin et al., 2019). In vegetative tissues, *DRT111* regulates pre-mRNA splicing of  
352 genes involved in light signaling and the circadian clock and acts upstream of PHYTOCHROME  
353 INTERACTING FACTORS (*PIFs*) transcription factors, a major class of phyB targets (Xin et al.,  
354 2017). Interestingly, we observed a differential expression of *PIF1/PIL5*, *PIF6/PIL2* and *PIF7* in

355 dry seeds of *drt111-2*: in particular *PIF1/PIL5* and *PIF6/PIL2* were upregulated and *PIF7* was  
356 slightly down-regulated.

357 *PIF1* inhibits GA signalling by promoting expression of DELLA repressors and, indirectly, by  
358 reducing GA levels (Oh et al., 2007; Paik et al., 2017). Indeed, up-regulation in *drt111-2* seeds  
359 observed for GIBERELLIC ACID INSENSITIVE (*GAI*) and *RGA-LIKE2 RGL2*, could also be  
360 dependent on an increased *PIF1* activity or expression (Lee et al., 2012).

361 In the dark, or in response to low R/FR ratio light, *PIF1* inhibits seed germination through  
362 activation of hormone-dependent, germination-inhibiting mechanisms, including the induction of  
363 ABA biosynthesis and signalling genes (Oh et al., 2009). This process is partly regulated by the  
364 action of *SOM* (Kim et al., 2008; Park et al., 2011) which in turn regulates *MOTHER-OF-FT-AND-*  
365 *TFL1* (Vaistij et al. 2018). This may be achieved through induction of expression and interaction  
366 with *ABI3* and *ABI5*, which may assist *PIF1* in target site selection and activation of transcription  
367 (Kim et al., 2008; Park et al., 2011; Kim et al., 2016). Here we have shown that expression of *SOM*  
368 is upregulated compared to wild-type in *drt111-2* imbibed seeds. Thus, regulation of *SOM* appears  
369 to be a major point of convergence of light and hormonal stimuli and *DRT111* may be involved in  
370 this signal integration by exerting a regulatory function on both *ABI3* and *PIF1*.

371 Since *phyB-9* seeds are hypersensitive to ABA and it has been previously shown that *phyB* plants  
372 maintain open stomata under stress conditions, similarly to what we observed in *drt111* mutants  
373 (Gonzalez et al., 2012), we cannot exclude that the light perception by *phyB* is involved in  
374 *DRT111*-dependent splicing events.

375  
376 Finally, the transcriptomic analysis identified several genes whose expression/splicing is affected in  
377 *drt111-2*, therefore, several other key factors may contribute to the observed ABA hypersensitivity  
378 in *drt111*. Among them, genes highly expressed in *drt111-2* included several members of the  
379 homeodomain leucine zipper class I TF (*ATHB-1*, *ATHB-5*, *ATHB-7*, *ATHB-12*), which have been  
380 largely studied for their role as regulators of abiotic stress responses. *ATHB-7* and *ATHB-12* are  
381 induced by water stress and ABA and control expression of several members of clade A PP2Cs, and  
382 are therefore considered negative regulators of ABA and stress responses (Arce et al., 2011; Valdes  
383 et al., 2012; Sessa et al., 2018). On the contrary, *ATHB-5* whose expression is positively regulated  
384 by *ABI1*, *ABI3*, *ABI5*, is considered a positive regulator of ABA signaling since enhanced levels of  
385 *ATHB-5* result in elevated ABA responses (Johannesson et al., 2003). *ATHB-1*, in particular, was  
386 shown to be regulated at the expression level by *PIF1/PIL5* and regulates hypocotyl growth in short  
387 days (Capella et al., 2015). Future work will analyse the molecular details of the regulation operated  
388 by *DRT111* on its targets.

389 AS defects in *drt111* concerned predominantly IR and A3SS. Other splicing effectors and regulators  
390 affecting stress responses regulate these two AS classes. An increased splicing efficiency of IR  
391 prone introns was shown to be important for acclimation to drought stress and splicing regulator  
392 HIN1 is involved in this process (Chong et al., 2019). Similarly, SAD1 splicing factor increased  
393 A3SS usage under salt stress conditions (Xing et al., 2015). How DRT111 and  
394 components/regulators of the spliceosome, including SUA, SF1, U2AF<sup>65</sup> associate/compete to  
395 determine the splicing of specific transcripts will be important to establish the contribution of this  
396 layer of regulation in defining the proteome during ABA and stress responses.

397 In conclusion, ours and previous evidence shows that DRT111 constitutes a point of integration of  
398 light and ABA-dependent signaling by controlling expression and splicing of key factors such as  
399 *ABI3* and *PIF* transcription factors.

400

## 401 **Experimental Procedures**

### 402 *Plant materials, growth conditions and germination assays*

403 The Columbia (Col-0) and Landsberg (Ler) ecotypes were used as wild-type. The *drt111* T-DNA  
404 insertion mutants: *drt111-1* (GABI\_351E09), *drt111-2* (SALK\_001489) were obtained from the  
405 Nottingham Arabidopsis Stock Centre (NASC). *sua-2* and *sua-2/abi3-5* were kindly donated by  
406 Professor Wim Soppe (Max Planck Institute for Plant Breeding Research, Germany; present address  
407 Rijk Zwaan, Netherlands). *abi3-5* was donated by Dr. Lucio Conti (Department of Biosciences,  
408 University of Milan, Italy). *Arabidopsis thaliana* plants were grown on soil in a growth chamber  
409 (14 h light /10 h dark) at 24°C. For germination tests, seeds harvested the same day from plants  
410 grown in parallel and stored for the same time were compared. Freshly harvested seeds or dry  
411 stored (after-ripened) for different times as indicated in figure legends were used. Seeds were sown  
412 on GM medium (1X MS salts, 0.5% sucrose, pH 5.7) or medium containing different  
413 concentrations of ABA (0.5 µM, 2 µM, 5 µM, 10 µM). After stratification treatment at 4°C for 2  
414 days, seeds were transferred to a growth chamber (16 h light / 8 h dark) at 24°C. Germination  
415 percentage was evaluated in terms of radicle emergence or fully expanded cotyledons. Gene  
416 expression analysis was carried out using 7-day-old seedlings grown on GM plates and then  
417 transferred to GM or GM containing NaCl (120 mM) and ABA (50 µM) for 3, 6 and 9 h, or NaCl  
418 (120 mM), ABA (10 µM) or PEG (35% w/v) for 2 and 5 days.

419

### 420 *RNA extraction, cDNA synthesis and qRT-PCR*

421 Total RNA was isolated from 100 mg of seedlings using RNeasy Plant Mini Kit (Qiagen, Hilden,  
422 Germany) according to manufacturer's instructions. For RNA deep sequencing and qRT-PCR, total

423 RNA was extracted from 100mg of dry seeds or imbibed seeds (in H<sub>2</sub>O, 24h in dark, 4°C) using  
424 method reported in Oñate-Sánchez and Vicente-Carbajosa (2008). cDNA was synthesized using the  
425 QuantiTect Reverse Transcription Kit (Qiagen, Hilden, Germany), starting from 1µg of DNase-  
426 treated RNA. For qRT-PCR, 4.5 µl of diluted (1:20) cDNA was used for each reaction, with 6.25 µl  
427 of 1X Platinum SYBR Green qPCR SuperMix (Life Technologies, Carlsbad, CA, USA) and 1.75 µl  
428 of primer mix (5 µM). PCR was performed using ABI 7900 HT (Applied Biosystems, Foster City,  
429 CA, USA). Cycling conditions were: 10 min at 95°C, followed by 40 cycles of 95°C for 15s and  
430 60°C for 1 min. Three biological replicates, each with three technical replicates were tested. The  
431 relative quantification of gene expression was calculated based on the  $2^{-\Delta\Delta Ct}$  method (Livak and  
432 Schmittgen, 2001). The elongation Factor *EF1α* was used as endogenous reference gene and RNA  
433 isolated from control plants as calibrator sample. Primers used are listed in Supplemental Table S2.

434

#### 435 *Generation of DRT111 transgenic plants*

436 Transgenic Arabidopsis plants were produced using binary vectors obtained by Gateway technology  
437 (Life Technologies, Carlsbad, CA, USA). To study promoter activity, the sequence of *DRT111*  
438 promoter (2kb upstream of the start codon) was amplified from genomic DNA of Col-0 plants. To  
439 permit both N-terminus than C-terminus fusion with tags, the coding sequence of *DRT111* was  
440 amplified with or without STOP codon. For the complementation of *drt111* mutants, the genomic  
441 fragment of *DRT111* including the upstream 1kb or 2kb region were amplified. Primers used are  
442 listed in Supplemental Table S2. PCR amplifications were performed using Phusion DNA  
443 polymerase (Thermo scientific, Waltham, MA, USA). The amplicones were cloned into  
444 pDONR207 (Life Technologies, Carlsbad, CA, USA) using BP clonase (Life Technologies,  
445 Carlsbad, CA, USA) to obtain entry vectors.

446 Recombination with destination vectors was performed using LR clonase (Life Technologies,  
447 Carlsbad, CA, USA). pMDC164 (Curtis and Grossniklaus, 2003) was used for promoter studies,  
448 pGWB411 and pGWB412 (Nakagawa et al., 2007) to produce FLAG-tagged over-expressing plants,  
449 pEG302 (Earley et al., 2006) for mutant complementation. The resulting recombinant binary  
450 vectors were then introduced into the *Agrobacterium tumefaciens* GV3101 strain, which was then  
451 used to transform Col-0 plants or *drt111* mutants using the floral dip method (Clough and Bent,  
452 1998).

453

#### 454 *GUS assay*

455 Histochemical analysis of GUS activity was performed as described previously (Batelli et al., 2012).  
456 The tissues from transgenic Arabidopsis plants transformend with *DRT111promoter::GUS* construct

457 were washed in 70% ethanol and cleared with chloralhydrate/glycerol solution. Samples were  
458 analysed and photographed under an Axioskop 2 plus microscope (Zeiss) equipped with a Nikon  
459 Coolpix 990 camera.

#### 460 *Stomatal measurements*

461 Detached leaves from 4-week-old plants were used for stomatal measurements. For stomatal  
462 aperture assay, epidermal peels were floated in SOS solution (20 mM KCl, 1 mM CaCl<sub>2</sub>, and 5 mM  
463 MES-KOH pH 6.15) for 2.5h at light to induce stomatal opening. Then the buffer was replaced with  
464 fresh SOS containing 50µM of ABA or fresh SOS without ABA and incubated at light for 2.5h. 100  
465 stomata were randomly observed using a Leica DMR microscope. The widths and lengths of  
466 stomata pores were measured using Image J software.

467

#### 468 *Yeast two-hybrid assay*

469 For the yeast two hybrid assay, the coding sequence of *DRT111* was cloned into the BamH1 and  
470 XhoI restriction sites of pGADT7 vector (Clontech, Mountain View, CA, USA) and the cDNA  
471 fragments of *SF1* were cloned into the SmaI and SalI sites of pGBKT7 (Clontech, Mountain View,  
472 CA, USA) using primers listed in Supplemental Table S2. To evaluate the interaction between  
473 DRT11 and the different SF1 fragments, the obtained constructs were co-transformed into  
474 *S.cerevisiae* AH109 strain using the LiAc-mediated transformation method (Bai and Elledge, 1996)  
475 and plated on SD medium (7.5 g/L Yeast Nitrogen Base, 0.75 g/L amino acid mix, 20 g L/1 glucose,  
476 pH 5.8) lacking Leu and Trp. Yeast cultures were grown overnight and an equal amount was  
477 dropped on SD lacking Leu and Trp medium to guarantee the presence of both vectors, and onto SD  
478 medium lacking Leu, Trp, Ade and His to verify the protein-protein interaction (Ruggiero et al.,  
479 2019). Empty vectors pGBKT7 and pGADT7 were used as negative controls.

480

#### 481 *Bimolecular fluorescence complementation assay*

482 The CDS of DRT111 and SF1 were cloned by Gateway technology in the pUGW2 and pUGW0  
483 vectors (Nakagawa et al., 2007) to guarantee the downstream fusion of the C-terminal YFP region  
484 and upstream fusion of N-terminal YFP region, respectively. Primers are listed in Supplemental  
485 Table S2. *Nicotiana tabacum* leaf protoplasts were prepared and transfected according to Pedrazzini  
486 et al. (1997). 40 µg of DNA for each construct was introduced in 1x10<sup>6</sup> protoplasts using PEG-  
487 mediated transfection. Following 16h incubation in the dark at 25°C, the cells were imaged with an  
488 Inverted Z.1 microscope (Zeiss, Germany) equipped with a Zeiss LSM 700 spectral confocal laser-  
489 scanning unit (Zeiss, Germany). Samples were excited with a 488 nm, 10 mW solid laser with

490 emission split at 505 nm for YFP and excited with a 555 nm, 10 mW solid laser with emission split  
491 at 551 nm for chlorophyll detection

492

#### 493 *RNA sequencing analysis*

494 For RNA deep sequencing, total RNA was extracted from dry seeds and DNase treated using  
495 RNAeasy plant kit (Qiagen, Hilden, Germany). Three biological replicates per genotype (Columbia-  
496 0 and *drt111-2*) were used. Library construction was performed using the Illumina TruSeq RNA  
497 Sample Preparation Kit (Illumina, SanDiego, CA, USA) prior to sequencing in single (2x100,  
498 ~45.000.000 total reads/sample) on Illumina platform Hiseq 2500. The sequencing service was  
499 provided by Genomix4life (<http://www.genomix4life.com>) at Laboratory of Molecular Medicine  
500 and Genomics (University of Salerno, Italy). Raw sequences are deposited in NCBI Sequence Read  
501 Archive, bioproject PRJNA557116. Prior to further analysis, a quality check was performed on the  
502 raw sequencing data by using FastQC (<https://www.bioinformatics.babraham.ac.uk/projects/fastqc/>),  
503 then low quality portions of the reads were removed with BBDuk ([sourceforge.net/projects/bbmap/](http://sourceforge.net/projects/bbmap/)).  
504 The minimum length of the reads after trimming was set to 35 bp and the minimum base quality  
505 score to 25. The high quality reads were aligned against the *Arabidopsis thaliana* reference genome  
506 sequence (Araport11) with STAR aligner (version 2.5.0c, Doblin et al., 2013). FeatureCounts  
507 (version 1.4.6-p5, Liao et al., 2013) was used together with the most recent *Arabidopsis thaliana*  
508 annotation to calculate gene expression values as raw read counts. Normalized TMM and FPKM  
509 values were calculated. All the statistical analyses were performed with *R* with the packages  
510 HTSFilter (Rau et al., 2013) and edgeR (Robinson et al., 2010). The first step was the removal of  
511 not expressed genes and the ones showing too much variability. The HTSFilter package was chosen  
512 for this scope, which implements a filtering procedure for replicated transcriptome sequencing data  
513 based on a Jaccard similarity index. The “Trimmed Means of M-values” (TMM) normalization  
514 strategy was used. The filter was applied to the different experimental conditions in order to identify  
515 and remove genes that appear to generate an uninformative signal. The overall quality of the  
516 experiment was evaluated, on the basis of the similarity between replicates, by a Principal  
517 Component Analysis (PCA) using the normalized gene expression values as input. The differential  
518 expression analysis was performed to identify the genes that are differentially expressed in all  
519 comparisons. Only genes with  $|\log_2(\text{fold-change})| > 0.21$  and FDR equal or lower than 0.05 were  
520 considered as Differentially Expressed Genes (DEGs).

521 In order to identify the number of different splicing events the software rMATS (V 3.2.5, Shen et al.,  
522 2014) was used. Prior to further analysis, the high quality reads were aligned against the  
523 *Arabidopsis thaliana* genome using Araport11 as reference with STAR aligner (version 2.5.0c),



524 with Local Mapping option due to the restrictions in the splicing software. An FDR filter of  $\leq 0.05$   
525 was used to detect significant differences in splicing events between Col-0 and *drt111*. The  
526 bioinformatics analysis was performed by Sequentia Biotech (<http://www.sequentiabiotech.com>).  
527 For the DEGs and significantly different splicing events, a Gene Ontology Enrichment Analysis  
528 (GOEA) was performed to identify the most enriched Gene Ontology (GO) categories across the  
529 down- and up-regulated genes (P value < 0.05 and FDR < 0.05) following the method described in  
530 Tian et al. 2017.

531

### 532 *Accession Numbers*

533 The genes used in this study are: DRT111/SFPS (At1g30480), SUA (At3g54230), PIF1/PIL5  
534 (At2g20180), ABI3 (At3g24650), SF1 (At5g51300), SOM (At1g03790), phyB (At2g18790).

535

### 536 **Acknowledgments**

537 We are thankful to Prof. Wim Soppe, Dr. Lucio Conti and Dr. Eirini Kaiserli for providing seeds.  
538 We acknowledge Mr. Rosario Nocerino and Gaetano Guarino for excellent technical assistance.  
539 This research was carried out with funding from the Italian Ministry of University and Research,  
540 GenHORT (PON02\_00395\_3215002), GenoPOM-PRO (PON02\_00395\_3082360) and from  
541 Ministry of Agricultural, Food and Forestry Policies, BIOTECH projects. Paola Punzo was the  
542 recipient of a fellowship by Regione Campania, POR Campania FSE 2014/2020 Program “Sviluppo  
543 di processi innovativi e di prodotti di qualità per il benessere dei consumatori e la valorizzazione del  
544 comparto agroalimentare campano”.

545

### 546 **Conflict of Interest**

547 The authors have no conflict of interest to declare

548

### 549 **Supplemental data**

#### 550 **Supplemental Materials and Methods.**

551 **Supplemental Figure S1.** DRT111 protein alignment.

552 **Supplemental Figure S2.** Sub-cellular localization of DRT111 protein.

553 **Supplemental Figure S3.** Identification of *DRT111* knockout mutants and over-expressing plants.

554 **Supplemental Figure S4.** Analysis of enriched Gene Ontology categories and validation of RNA-  
555 seq data.

556 **Supplemental Figure S5.** Germination of *phyB-9*, *pifq*, *pil5-1*, *pil5-3* and *phyB* in the presence of  
557 ABA.

558 **Supplemental Table S1.** List of DEGs in *drt111-2* seeds previously identified as *ABI3* targets.

559 **Supplemental Table S2.** List of primers used in this study.

560 **Supplemental Data Set1.** Genes differentially expressed in *drt111-2* seeds and Gene Ontology  
561 Enrichment Analysis.

562 **Supplemental Data Set2.** Alternative splicing events defective in *drt111-2* seeds.

563 **Supplemental Data Set3.** Gene Ontology Enrichment Analysis of alternative splicing events  
564 defective in *drt111-2* seeds.

565

566

## 567 **Literature Cited**

568 Ambrosone, A., Batelli, G., Nurcato, R., Aurilia, V., Punzo, P., Bangarusamy, D.K., Ruberti, I.,  
569 Sassi, M., Leone, A., Costa, A. et al. (2015). The Arabidopsis RNA-Binding Protein AtRGGA  
570 Regulates Tolerance to Salt and Drought Stress. *Plant Physiology* 168(1):292-306.  
571 <https://doi.org/10.1104/pp.114.255802>.

572 Ambrosone, A., Batelli, G., Bostan, H., D'Agostino, N., Chiusano, M.L., Perrotta, G., Leone, A.,  
573 Grillo, S., Costa, A. (2017). Distinct gene networks drive differential response to abrupt or  
574 gradual water deficit in potato. *Gene*, 597, 30–39.  
575 <https://doi.org/10.1016/J.GENE.2016.10.024>

576 Arce, A. L., Raineri, J., Capella, M., Cabello, J. V. & Chan, R. L. (2011). Uncharacterized  
577 conserved motifs outside the HD-Zip domain in HD-Zip subfamily I transcription factors; a  
578 potential source of functional diversity. *BMC Plant Biology*, 11(1), 42.  
579 <https://doi.org/10.1186/1471-2229-11-42>

580 Bai, C., and Elledge, S. J. (1996). [27] Gene identification using the yeast two-hybrid system.  
581 *Methods in Enzymology*, 273, 331–347. [https://doi.org/10.1016/S0076-6879\(96\)73029-X](https://doi.org/10.1016/S0076-6879(96)73029-X)

582 Batelli, G., Massarelli, I., Van Oosten, M., Nurcato, R., Vannini, C., Raimondi, G., Leone, A., Zhu,  
583 J.K., Maggio, A., Grillo, S. (2012). *Asg1* is a stress-inducible gene which increases stomatal  
584 resistance in salt stressed potato. *Journal of Plant Physiology*, 169(18), 1849–1857.  
585 <https://doi.org/10.1016/J.JPLPH.2012.07.004>

586 Bauer, H., Ache, P., Wohlfart, F., Al-Rasheid, K. A., Sonnewald, S., Sonnewald, U., Kneitzd,  
587 S., Hetherington, A.M., and Hedrich, R. (2013). How do stomata sense reductions in  
588 atmospheric relative humidity?. *Molecular Plant*, 6(5), 1703-1706.

589 Bies-Etheve, N., da Silva Conceicao, A., Giraudat, J., Koornneef, M., Léon-Kloosterziel, K., Valon,  
590 C., Delseny, M. (1999). Importance of the B2 domain of the Arabidopsis *ABI3* protein for Em

- 591 and 2S albumin gene regulation. *Plant Molecular Biology*, 40(6), 1045–1054.  
592 <https://doi.org/10.1023/A:1006252512202>
- 593 Capella M., Ribone P.A., Arce A.L., Chan R.L. (2015) Arabidopsis thaliana HomeoBox 1 (AtHB1),  
594 a Homeodomain-Leucine Zipper I (HD-Zip I) transcription factor, is regulated by  
595 PHYTOCHROME-INTERACTING FACTOR 1 to promote hypocotyl elongation. *New*  
596 *Phytologist* 207(3):669-82. . <https://doi.org/10.1111/nph.13401>.
- 597 Carrasco-López, C., Hernández-Verdeja, T., Perea-Resca, C., Abia, D., Catalá, R., Salinas, J. (2017).  
598 Environment-dependent regulation of spliceosome activity by the LSM2-8 complex in  
599 Arabidopsis. *Nucleic Acids Research*, 45(12), 7416–7431. <https://doi.org/10.1093/nar/gkx375>
- 600 Carvalho, R.F., Carvalho S.D., Duque P. (2010). The Plant-Specific SR45 Protein Negatively  
601 Regulates Glucose and ABA Signaling during Early Seedling Development in Arabidopsis  
602 *Plant Physiology* 154(2): 772–783. <https://doi.org/10.1104/pp.10.155523>
- 603 Chong, G.L., M.H., Lin, W.-D., Wong, M.M., Verslues P.E. (2019) Highly ABA-Induced 1  
604 (HAI1)-Interacting protein HIN1 and drought acclimation-enhanced splicing efficiency at  
605 intron retention sites *PNAS* 116 (44): 22376–22385. <https://doi.org/10.1073/pnas.1906244116>
- 606 Clough, S. J., Bent, A. F. (1998). Floral dip: a simplified method for Agrobacterium-mediated  
607 transformation of Arabidopsis thaliana. *The Plant Journal*, 16(6), 735–743.  
608 <https://doi.org/10.1046/j.1365-313x.1998.00343.x>
- 609 Crisci, A., Raleff, F., Bagdiul, I., Raabe, M., Urlaub, H., Rain, J.-C., Krämer, A. (2015).  
610 Mammalian splicing factor SF1 interacts with SURP domains of U2 snRNP-associated  
611 proteins. *Nucleic Acids Research*, 43(21), gkv952. <https://doi.org/10.1093/nar/gkv952>
- 612 Cui, P., Zhang, S., Ding, F., Ali, S., Xiong, L. (2014). Dynamic regulation of genome-wide pre-  
613 mRNA splicing and stress tolerance by the Sm-like protein LSm5 in Arabidopsis. *Genome*  
614 *Biology*, 15(1), R1. <https://doi.org/10.1186/gb-2014-15-1-r1>
- 615 Curtis M.D., Grossniklaus U. (2003) A gateway cloning vector set for high-throughput functional  
616 analysis of genes in planta. *Plant Physiology* 133:462–9.  
617 <https://doi.org/10.1104/pp.103.027979>
- 618 de Wit, M., Galvão, V. C., Fankhauser, C. (2016). Light-Mediated Hormonal Regulation of Plant  
619 Growth and Development. *Annual Review of Plant Biology*, 67(1), 513–537.  
620 <https://doi.org/10.1146/annurev-arplant-043015-112252>
- 621 Dobin, A., Davis, C.A., Schlesinger, F., Drenkow, J., Zaleski, C., Jha, S., Batut, P., Chaisson, M.  
622 and Gingeras, T.R., (2013). STAR: ultrafast universal RNA-seq aligner. *Bioinformatics*, 29(1),  
623 pp.15-21.
- 624 Earley, K. W., Haag, J. R., Pontes, O., Opper, K., Juehne, T., Song, K., Pikaard, C. S. (2006).  
625 Gateway-compatible vectors for plant functional genomics and proteomics. *The Plant Journal*,  
626 45(4), 616–629. <https://doi.org/10.1111/j.1365-313X.2005.02617.x>

- 627 Finch-Savage, W. E., Leubner-Metzger, G. (2006). Seed dormancy and the control of germination.  
628 *New Phytologist*, 171(3), 501–523. <https://doi.org/10.1111/j.1469-8137.2006.01787.x>
- 629 Fu, X.-D., Ares, M. (2014). Context-dependent control of alternative splicing by RNA-binding  
630 proteins. *Nature Reviews Genetics*, 15(10), 689–701. <https://doi.org/10.1038/nrg3778>
- 631 Gonzalez, C.V. Ibarra S.E., Piccoli P.N., Botto, J.F., Boccacandro HE. (2012) Phytochrome B  
632 increases drought tolerance by enhancing ABA sensitivity in *Arabidopsis thaliana*. *Plant Cell*  
633 *Environment* 35(11):1958-68. <https://doi.org/10.1111/j.1365-3040.2012.02529.x>.
- 634 Hegele, A., Kamburov, A., Grossmann, A., Sourlis, C., Wowro, S., Weimann, M., Will, C.L., Pena,  
635 V., Lührmann, R., Stelzl, U. (2012). Dynamic Protein-Protein Interaction Wiring of the Human  
636 Spliceosome. *Molecular Cell*, 45(4), 567–580.  
637 <https://doi.org/10.1016/J.MOLCEL.2011.12.034>
- 638 Hetherington, A. M., Woodward, F. I. (2003). The role of stomata in sensing and driving  
639 environmental change. *Nature*, 424(6951), 901-908.
- 640 Hugouvieux, V., Kwak, J. M., Schroeder, J. I. (2001). An mRNA Cap Binding Protein, ABH1,  
641 Modulates Early Abscisic Acid Signal Transduction in *Arabidopsis*. *Cell*, 106(4), 477–487.  
642 [https://doi.org/10.1016/S0092-8674\(01\)00460-3](https://doi.org/10.1016/S0092-8674(01)00460-3)
- 643 Jang, Y.H., Park, H.Y., Lee, K.C., Thu, M.P., Kim, S.K., Suh, M.C., Kang, H., Kim, J.K. (2014). A  
644 homolog of splicing factor SF1 is essential for development and is involved in the alternative  
645 splicing of pre-mRNA in *Arabidopsis thaliana*. *The Plant Journal*, 78(4), 591–603.  
646 <https://doi.org/10.1111/tpj.12491>
- 647 Johannesson, H., Wang, Y., Hanson, J., Engström, P. (2003). The *Arabidopsis thaliana* homeobox  
648 gene *ATHB5* is a potential regulator of abscisic acid responsiveness in developing seedlings.  
649 *Plant Molecular Biology*, 51(5), 719–729. <https://doi.org/10.1023/A:1022567625228>
- 650 Kim, D.H., Yamaguchi, S., Lim, S., Oh, E., Park, J., Hanada, A., Kamiya, Y., Choi, G. (2008).  
651 *SOMNUS*, a CCCH-Type Zinc Finger Protein in *Arabidopsis*, Negatively Regulates Light-  
652 Dependent Seed Germination Downstream of *PIL5*. *The Plant Cell*. (20)5: 1260–1277.  
653 <https://doi.org/10.1105/tpc.108.058859>
- 654 Kim, J., Kang, H., Park, J., Kim, W., Yoo, J., Lee, N., Kim, J., Yoon, T.Y., Choi, G. (2016). PIF1-  
655 Interacting Transcription Factors and Their Binding Sequence Elements Determine the in Vivo  
656 Targeting Sites of PIF1. *The Plant Cell*. (28) 6: 1388–1405  
657 <https://doi.org/10.1105/tpc.16.00125>
- 658 Kuromori, T., Seo, M., Shinozaki, K. (2018). ABA transport and plant water stress responses.  
659 *Trends in plant science*, 23(6), pp.513-522. doi: 10.1016/j.tplants.2018.04.001. Epub 2018  
660 May 3.
- 661 Lallena, M. J., Chalmers, K. J., Llamazares, S., Lamond, A. I., Valcárcel, J. (2002). Splicing  
662 Regulation at the Second Catalytic Step by *Sex-lethal* Involves 3' Splice Site Recognition by  
663 *SPF45*. *Cell*, 109(3), 285–296. [https://doi.org/10.1016/S0092-8674\(02\)00730-4](https://doi.org/10.1016/S0092-8674(02)00730-4)

- 664 Laloum, T., Martín, G., Duque, P. (2018). Alternative Splicing Control of Abiotic Stress Responses.  
665 Trends in Plant Science, 23(2), 140–150. <https://doi.org/10.1016/J.TPLANTS.2017.09.019>
- 666 Lau, O. S., Deng, X. W. (2010). Plant hormone signaling lightens up: integrators of light and  
667 hormones. Current Opinion in Plant Biology, 13(5), 571–577.  
668 <https://doi.org/10.1016/J.PBI.2010.07.001>
- 669 Lee, K. C., Jang, Y. H., Kim, S.-K., Park, H.-Y., Thu, M. P., Lee, J. H., Kim, J.-K. (2017). RRM  
670 domain of Arabidopsis splicing factor SF1 is important for pre-mRNA splicing of a specific  
671 set of genes. Plant Cell Reports, 36(7), 1083–1095. <https://doi.org/10.1007/s00299-017-2140-1>
- 672 Lee, K.P., Piskurewicz, U., Turečková, V., Carat, S., Chappuis, R., Strnad, M., Fankhauser, C.,  
673 Lopez-Molina, L. (2012). Spatially and genetically distinct control of seed germination by  
674 phytochromes A and B. Genes & Development, 26(17), 1984–1996.  
675 <https://doi.org/10.1101/gad.194266.112>
- 676 Liao, Y., Smyth, G.K. and Shi, W., (2013). featureCounts: an efficient general purpose program for  
677 assigning sequence reads to genomic features. *Bioinformatics*, 30(7), pp.923-930.
- 678 Livak, K. J., Schmittgen, T. D. (2001). Analysis of Relative Gene Expression Data Using Real-  
679 Time Quantitative PCR and the  $2^{-\Delta\Delta CT}$  Method. *Methods*, 25(4), 402–408.  
680 <https://doi.org/10.1006/METH.2001.1262>
- 681 Manz, B., Müller, K., Kucera, B., Volke, F., Leubner-Metzger, G. (2005). Water uptake and  
682 distribution in germinating tobacco seeds investigated in vivo by nuclear magnetic resonance  
683 imaging. *Plant Physiology*, 138(3), 1538–1551. <https://doi.org/10.1104/pp.105.061663>
- 684 Marquez, Y., Höpfler, M., Ayatollahi, Z., Barta, A., Kalyna, M. (2015). Unmasking alternative  
685 splicing inside protein-coding exons defines exitrons and their role in proteome  
686 plasticity. *Genome research*, 25(7), 995-1007.
- 687 Mönke, G., Seifert, M., Keilwagen, J., Mohr, M., Grosse, I., Hähnel, U., Junker, A., Weisshaar, B.,  
688 Conrad, U., Bäumlein, H., et al. (2012). Toward the identification and regulation of the  
689 Arabidopsis thaliana ABI3 regulon. *Nucleic Acids Research*, 40(17), 8240–8254.  
690 <https://doi.org/10.1093/nar/gks594>
- 691 Nambara E, Marion-Poll A. (2005) Abscisic acid biosynthesis and catabolism. *Annu Rev Plant Biol.*  
692 (56),165-85.
- 693 Nakagawa, T., Kurose, T., Hino, T., Tanaka, K., Kawamukai, M., Niwa, Y., Toyooka, K.,  
694 Matsuoka, K., Jinbo, T., Kimura, T. (2007). Development of series of gateway binary vectors,  
695 pGWBs, for realizing efficient construction of fusion genes for plant transformation. *J.*  
696 *Biosciences and Bioengineering*. 104, 34–41. doi: 10.1263/jbb.104.34
- 697 Nilsen, T. W., Graveley, B. R. (2010). Expansion of the eukaryotic proteome by alternative splicing.  
698 *Nature*, 463(7280), 457–463. <https://doi.org/10.1038/nature08909>
- 699 Oh, E., Kang, H., Yamaguchi, S., Park, J., Lee, D., Kamiya, Y., Choi, G. (2009). Genome-wide  
700 analysis of genes targeted by PHYTOCHROME INTERACTING FACTOR 3-LIKE5 during

- 701 seed germination in *Arabidopsis*. *The Plant Cell*, 21(2), 403–419.  
702 <https://doi.org/10.1105/tpc.108.064691>
- 703 Oh, E., Yamaguchi, S., Hu, J., Yusuke, J., Jung, B., Paik, I., Lee, H.S., Sun, T.P., Kamiya, Y., Choi,  
704 G. (2007). PIL5, a phytochrome-interacting bHLH protein, regulates gibberellin responsiveness  
705 by binding directly to the GAI and RGA promoters in *Arabidopsis* seeds. *Plant Cell* 19:1192–  
706 208. <https://doi.org/10.1105/tpc.107.050153>
- 707 Oñate-Sánchez, L., Vicente-Carbajosa, J. (2008). DNA-free RNA isolation protocols for  
708 *Arabidopsis thaliana*, including seeds and siliques. *BMC Research Notes*, 1(1), 93.  
709 <https://doi.org/10.1186/1756-0500-1-93>
- 710 Ooms, J., Leon-Kloosterziel, K. M., Bartels, D., Koornneef, M., Karssen, C. M. (1993). Acquisition  
711 of Desiccation Tolerance and Longevity in Seeds of *Arabidopsis thaliana* (A Comparative  
712 Study Using Abscisic Acid-Insensitive *abi3* Mutants). *Plant Physiology*, 102(4), 1185–1191.  
713 <https://doi.org/10.1104/pp.102.4.1185>
- 714 Paik, I., Kathare, P. K., Kim, J.-I., Huq, E. (2017). Expanding Roles of PIFs in Signal Integration  
715 from Multiple Processes. *Molecular Plant*, 10(8), 1035–1046.  
716 <https://doi.org/10.1016/J.MOLP.2017.07.002>
- 717 Pang, Q., Hays, J. B., Rajagopal, I. (1993). Two cDNAs from the plant *Arabidopsis thaliana* that  
718 partially restore recombination proficiency and DNA-damage resistance to *E.coli* mutants  
719 lacking recombination-intermediate-resolution activities. *Nucleic Acids Research*, 21(7),  
720 1647–1653. <https://doi.org/10.1093/nar/21.7.1647>
- 721 Parcy, F., Valon, C., Raynal, M., Gaubier-Comella, P., Delseny, M., Giraudat, J. (1994). Regulation  
722 of gene expression programs during *Arabidopsis* seed development: roles of the ABI3 locus  
723 and of endogenous abscisic acid. *The Plant Cell*, 6(11), 1567–1582.  
724 <https://doi.org/10.1105/tpc.6.11.1567>
- 725 Park, H.-Y., Lee, K. C., Jang, Y. H., Kim, S.-K., Thu, M. P., Lee, J. H., Kim, J.-K. (2017). The  
726 *Arabidopsis* splicing factors, AtU2AF65, AtU2AF35, and AtSF1 shuttle between nuclei and  
727 cytoplasm. *Plant Cell Reports*, 36(7), 1113–1123. <https://doi.org/10.1007/s00299-017-2142-z>
- 728 Park, J., Lee, N., Kim, W., Lim, S., Choi, G. (2011). ABI3 and PIL5 Collaboratively Activate the  
729 Expression of SOMNUS by Directly Binding to Its Promoter in Imbibed *Arabidopsis* Seeds.  
730 *The Plant Cell*, 23(4), 1404–1415. <https://doi.org/10.1105/TPC.110.080721>
- 731 Pedrazzini, E., Giovanazzo, G., Bielli, A., de Virgilio, M., Frigerio, L., Pesca, M., Faoro, F., Bollini,  
732 R., Ceriotti, A., Vitale, A. (1997). Protein quality control along the route to the plant vacuole.  
733 *The Plant Cell* (9): 1869–1880. <https://doi.org/10.1105/tpc.9.10.1869>
- 734 Penfield, S., Josse, E.-M., Halliday, K. J. (2010). A role for an alternative splice variant of PIF6 in  
735 the control of *Arabidopsis* primary seed dormancy. *Plant Molecular Biology*, 73(1–2), 89–95.  
736 <https://doi.org/10.1007/s11103-009-9571-1>

- 737 Perruc, E., Kinoshita, N., Lopez-Molina, L. (2007). The role of chromatin-remodeling factor PKL  
738 in balancing osmotic stress responses during Arabidopsis seed germination. *The Plant Journal*,  
739 52(5), 927–936. <https://doi.org/10.1111/j.1365-313X.2007.03288.x>
- 740 Punzo, P., Ruggiero, A., Possenti, M., Nurcato, R., Costa, A., Morelli, G., Grillo, S., Batelli, G.  
741 (2018). The PP2A-interactor TIP41 modulates ABA responses in Arabidopsis thaliana. *The*  
742 *Plant Journal*, 94(6), 991–1009. <https://doi.org/10.1111/tpj.13913>
- 743 Qin, X., and Zeevaart, J. A. (1999). The 9-cis-epoxycarotenoid cleavage reaction is the key  
744 regulatory step of abscisic acid biosynthesis in water-stressed bean. *Proceedings of the*  
745 *National Academy of sciences*, 96(26), 15354-15361. <https://doi.org/10.1073/pnas.96.26.15354>
- 746 Rau, A., Gallopin, M., Celeux, G. and Jaffrézic, F., (2013). Data-based filtering for replicated high-  
747 throughput transcriptome sequencing experiments. *Bioinformatics*, 29(17), pp.2146-2152.
- 748 Robinson, M.D., McCarthy, D.J. and Smyth, G.K., (2010). edgeR: a Bioconductor package for  
749 differential expression analysis of digital gene expression data. *Bioinformatics*, 26(1), pp.139-  
750 140.
- 751 Ruggiero, A., Landi, S., Punzo, P., Possenti, M., Van Oosten, M.J., Costa, A., Morelli, G., Maggio,  
752 A., Grillo, S. and Batelli, G., (2019). Salinity and ABA Seed Responses in Pepper: Expression  
753 and Interaction of ABA Core Signaling Components. *Frontiers in plant science*, 10, p.304.
- 754 Santos-Mendoza, M., Dubreucq, B., Baud, S., Parcy, F., Caboche, M., Lepiniec, L. (2008) Deciphering  
755 gene regulatory networks that control seed development and maturation in Arabidopsis. *The*  
756 *Plant Journal* (54) 4: 608–620. <https://doi.org/10.1111/j.1365-313X.2008.03461.x>.
- 757 Schroeder, J. I., Kwak, J. M., Allen, G. J. (2001). Guard cell abscisic acid signalling and  
758 engineering drought hardiness in plants. *Nature*, 410(6826), 327–330.  
759 <https://doi.org/10.1038/35066500>
- 760 Sessa, G., Carabelli, M., Possenti, M., Morelli, G., Ruberti, I. (2018). Multiple Links between HD-  
761 Zip Proteins and Hormone Networks. *International Journal of Molecular Sciences*, 19(12),  
762 4047. <https://doi.org/10.3390/ijms19124047>
- 763 Shen, S., Park, J.W., Lu, Z.X., Lin, L., Henry, M.D., Wu, Y.N., Zhou, Q. and Xing, Y., (2014).  
764 rMATS: robust and flexible detection of differential alternative splicing from replicate RNA-  
765 Seq data. *Proceedings of the National Academy of Sciences*, 111(51), pp.E5593-E5601.
- 766 Staiger, D., Brown, J. W. S. (2013). Alternative Splicing at the Intersection of Biological Timing,  
767 Development, and Stress Responses *The Plant Cell*. (25) 10:3640-56.  
768 <https://doi.org/10.1105/tpc.113.113803>
- 769 Sugliani, M., Brambilla, V., Clerckx, E. J. M., Koornneef, M., Soppe, W. J. J. (2010). The  
770 Conserved Splicing Factor SUA Controls Alternative Splicing of the Developmental Regulator  
771 ABI3 in Arabidopsis. *The Plant Cell*, 22(6), 1936–1946.  
772 <https://doi.org/10.1105/TPC.110.074674>

- 773 Tian, T., Liu, Y., Yan, H., You, Q., Yi, X., Du, Z., Xu, W. and Su, Z., (2017). agriGO v2. 0: a GO  
774 analysis toolkit for the agricultural community, 2017 update. *Nucleic acids research*, 45(W1),  
775 pp.W122-W129.
- 776 Vaistij, F.E., Barros-Galvão, T., Cole, A.F., Gilday, A.D., He, Z., Li, Y., Harvey, D., Larson, T.R.,  
777 Graham, I.A. (2018). MOTHER-OF-FT-AND-TFL1 represses seed germination under far-red  
778 light by modulating phytohormone responses in *Arabidopsis thaliana*. *Proceedings of the*  
779 *National Academy of Sciences*, 115(33), 8442–8447.  
780 <https://doi.org/10.1073/PNAS.1806460115>
- 781 Valdés, A. E., Övernäs, E., Johansson, H., Rada-Iglesias, A., Engström, P. (2012). The  
782 homeodomain-leucine zipper (HD-Zip) class I transcription factors ATHB7 and ATHB12  
783 modulate abscisic acid signalling by regulating protein phosphatase 2C and abscisic acid  
784 receptor gene activities. *Plant Molecular Biology*, 80(4–5), 405–418.  
785 <https://doi.org/10.1007/s11103-012-9956-4>
- 786 Verslues, P. E., Agarwal, M., Katiyar-Agarwal, S., Zhu, J., Zhu, J.-K. (2006). Methods and  
787 concepts in quantifying resistance to drought, salt and freezing, abiotic stresses that affect plant  
788 water status. *The Plant Journal*, 45(4), 523–539. [https://doi.org/10.1111/j.1365-](https://doi.org/10.1111/j.1365-313X.2005.02593.x)  
789 [313X.2005.02593.x](https://doi.org/10.1111/j.1365-313X.2005.02593.x)
- 790 Wang P., Du Y., Hou Y.J., Zhao Y., Hsu C.C., Yuan F., Zhu X., Tao WA., Song C.P., Zhu  
791 JK.(2015). Nitric oxide negatively regulates abscisic acid signaling in guard cells by S-  
792 nitrosylation of OST1 *Proceedings of the National Academy of Sciences*, (112) 2:613-8.  
793 <https://doi.org/10.1073/pnas.1423481112>
- 794 Winter, D., Vinegar, B., Nahal, H., Ammar, R., Wilson, G. V., Provart, N. J. (2007). An “Electronic  
795 Fluorescent Pictograph” Browser for Exploring and Analyzing Large-Scale Biological Data  
796 Sets. *PLoS ONE*, 2(8), e718. <https://doi.org/10.1371/journal.pone.0000718>
- 797 Xin, R., Kathare, P. K., Huq, E. (2019). Coordinated regulation of pre-mRNA splicing by the SFPS-  
798 RRC1 complex to promote photomorphogenesis. *The Plant Cell*, tpc.00786.2018.  
799 <https://doi.org/10.1105/tpc.18.00786>
- 800 Xin, R., Zhu, L., Salomé, P.A., Mancini, E., Marshall, C.M., Harmon, F.G., Yanovsky, M.J.,  
801 Weigel, D., Huq, E. (2017). SPF45-related splicing factor for phytochrome signaling promotes  
802 photomorphogenesis by regulating pre-mRNA splicing in *Arabidopsis*. *Proceedings of the*  
803 *National Academy of Sciences of the United States of America*, (114) 33: E7018–E7027.  
804 <https://doi.org/10.1073/pnas.1706379114>
- 805 Xiong, Gong Z, Rock CD, Subramanian S, Guo Y, Xu W, Galbraith D, Zhu JK. (2001) Modulation  
806 of abscisic acid signal transduction and biosynthesis by an Sm-like protein in *Arabidopsis*. *Dev*  
807 *Cell*. 1:771–781. Doi: 10.1016/S1534-5807(01)00087-9.
- 808 Yan, A., Chen, Z. (2017). The pivotal role of abscisic acid signaling during transition from seed  
809 maturation to germination. *Plant Cell Reports*, 36(5), 689–703. [https://doi.org/10.1007/s00299-](https://doi.org/10.1007/s00299-016-2082-z)  
810 [016-2082-z](https://doi.org/10.1007/s00299-016-2082-z)



811 Yoo, C.Y., Pence H.E., Hasegawa P.M, Mickelbart M.V. (2009) Regulation of Transpiration to  
812 Improve Crop Water Use, *Critical Reviews in Plant Sciences*, 28(6), 410-431,  
813 DOI:10.1080/07352680903173175

814 Zhang, Z., Liu, Y., Ding, P., Li, Y., Kong, Q., Zhang, Y. (2014). Splicing of Receptor-Like Kinase-  
815 Encoding SNC4 and CERK1 is Regulated by Two Conserved Splicing Factors that Are  
816 Required for Plant Immunity. *Molecular Plant* (7) 12:1766-75. doi: 10.1093/mp/ssu103.

817 Zhang,Z, Zhang S, Zhang Y, Wang X, Li D, Li Q, Yue M, Li Q, Zhang YE, Xu Y, Xue Y, Chong  
818 K, Bao S. (2011) Arabidopsis floral initiator SKB1 confers high salt tolerance by regulating  
819 transcription and pre-mRNA splicing through altering histone H4R3 and small nuclear  
820 ribonucleoprotein LSM4 methylation. *The Plant Cell*. (1):396-411.  
821 doi:10.1105/tpc.110.081356

822 Zhu, F.Y., Chen, M.X., Ye, N.H., Shi, L., Ma, K.L., Yang, J.F., Cao, Y.Y., Zhang, Y., Yoshida, T.,  
823 Fernie, A.R., et al. (2017). Proteogenomic analysis reveals alternative splicing and translation  
824 as part of the abscisic acid response in Arabidopsis seedlings. *The Plant Journal*, 91(3), 518–  
825 533 <https://doi.org/10.1111/tpj.13571>

826

## 827 **Figure Legends**

828 **Figure 1.** *DRT111* promoter activity and gene expression. (A) *DRT111* tissue-specific expression  
829 based on *Arabidopsis* microarray data in the eFP browser (<http://bar.utoronto.ca>). Data are  
830 normalized by the GCOS method, TGT value of 100. (B) Histochemical localization of GUS in  
831 leaves of transgenic *Arabidopsis* adult plants expressing the *GUS* reporter gene driven by *DRT111*  
832 promoter (*DRT111*promoter::*GUS*). Scale bars are shown. (C) Relative expression of *DRT111* in 7-  
833 day-old seedlings after 3, 6 and 9 h exposure to NaCl (120 mM) or ABA (50  $\mu$ M) (D) Relative  
834 expression of *DRT111* in 7-day-old seedlings after 5 days exposure to NaCl (120 mM), ABA (10  
835  $\mu$ M) or polyethylene glycol (PEG; 35% W/V) ). Data were normalized using RNA from untreated  
836 seedlings, and the elongation factor *EF1a* as endogenous control. Data reported are means  $\pm$ SD of  
837 three biological replicates. The asterisks indicate significant differences compared to control  
838 condition according to Student's t-test (\* $P \leq 0.05$ , \*\* $P \leq 0.01$ ).

839 **Figure 2.** Interaction of *DRT111* with Splicing Factor 1 (SF1). (A) Yeast two-hybrid assay.  
840 *DRT111* in prey vector (pGADT7, AD domain) was co-transformed with the indicated fragments of  
841 SF1 cloned in the bait vector (pGBKT7, BD domain). The empty vectors pGADT7 and pGBKT7  
842 were used as negative controls. Overnight grown yeast culture was dropped onto selective media.  
843 Pictures were taken after 3 days incubation at 30°C. (B) Bimolecular fluorescence complementation  
844 assay. *Nicotiana tabacum* leaf protoplasts were co-transformed with 20  $\mu$ g each of plasmids  
845 encoding *DRT111* fused with N-terminus of YFP (nYFP) and SF1 fused with the C-terminus of

846 YFP (cYFP) . nYFP and cYFP empty vectors were used as negative controls. The cells were  
847 imaged by confocal microscopy 16 h later. For the interaction, zoom in images of the nucleus are  
848 shown in the last row. Chlorophyll autofluorescence, YFP fluorescence and merged images are  
849 shown. Scales bars are indicated.

850 **Figure 3.** Phenotyping of knockout mutants *drt111-1* (GABI\_351E09), *drt111-2* (SALK\_001489)  
851 and *DRT111* over-expressing lines (35S::FLAG-DRT111 #2, 4, 21) (A) Primary root length of 10-  
852 day-old wild type (Col-0), DRT111 mutants and transgenic lines grown on GM medium (1%  
853 sucrose) or medium containing ABA 20  $\mu$ M. (B) Water loss of detached leaves of *drt111* mutants,  
854 overexpressing lines (35S::FLAG-DRT111) and wild type (Col-0) plants. Data are averages  $\pm$  SE of  
855 two independent experiments (n=5 for each line, per experiment) and reported as percentages of  
856 initial fresh weight at different time points (0.5 to 6 hours). The asterisks indicate significant  
857 differences compared with wild type (\*P  $\leq$  0.05, \*\*P  $\leq$  0.01, \*\*\*P  $\leq$  0.001, \*\*\*\*P  $\leq$  0.0001,  
858 Student's t-test). (C) Stomatal aperture of *drt111-1* and *drt111-2* mutants and wild type plants in  
859 response to ABA. Leaf peels harvested from 2-week-old plants were incubated for 2 hours in SOS  
860 buffer under light and then treated with or without 50 $\mu$ M ABA for 2.5 hours. Asterisks indicate  
861 significant difference between sample with or without ABA (\*\* P  $\leq$  0.01; Student's t-test). D)  
862 Photographs of stomata of the indicated genotypes as reported in C. Scale bar: 25  $\mu$ m.

863 **Figure 4.** Germination analysis of *drt111* mutants (*drt111-1*, *drt111-2*), *DRT111* over-expressing  
864 lines (35S:FLAG-DRT111 #2, #4, #21), and wild-type (Col-0) and complementation of *drt1111*  
865 mutants with pDRT111:DRT111-FLAG (A-C) Germination percentage of 10 days after-ripened  
866 seeds scored in terms of radicle emergence (A) and cotyledon expansion (B) in presence of 0.5  $\mu$ M  
867 ABA and control media (C). Data are means  $\pm$ SD (n=150) of five biological replicates. D)  
868 Germination percentage of 1 year after-ripened seeds scored in terms of radicle emergence after 3  
869 day in the presence of different concentration of ABA. E) Germination analysis of *drt111* mutants  
870 transformed with *DRT111* genomic fragment including 1kb or 2kb upstream of the translation start  
871 site (1KbDRT111; 2kbDRT111) in pDRT111:DRT111-FLAG constructs. Germination reported as  
872 percentage in terms of radicle emergence in control condition (left) and in the presence of 0.5  $\mu$ M  
873 ABA (middle) and in terms of cotyledon expansion in presence of 0.5  $\mu$ M ABA (right). In all  
874 germination tests, seeds were stratified for 2 d before incubation at 24°C. The asterisks indicate  
875 significant differences compared to Col-0 according to Student's t-test (\*P  $\leq$  0.05, \*\*P  $\leq$  0.01, \*\*\*P  
876  $\leq$  0.001, \*\*\*\*P  $\leq$  0.0001).

877 **Figure 5.** Alternative splicing (AS) events altered in *drt111-2*. A) Number of different AS events  
878 UP- (a greater prevalence of AS event in the mutant vs. Col-0) and DOWN- (a lower prevalence of

879 AS event in the mutant vs. Col-0) regulated in *drt111-2* dry seeds. **B**) Percentage of splicing events  
880 significantly UP- and DOWN-regulated in *drt111-2* with respect to the total AS events defective in  
881 *drt111-2*. ES: Exon skipping; MXE: Mutually exclusive exon; IR: Intron retaining; A3SS:  
882 Alternative 3' splice site; A5SS: Alternative 5' splice site. **(C-J)** Validation of RNA-seq data by  
883 qRT-PCR. **(C, E, G and I)** Representation of AS differences between Col-0 and *drt111-2* detected  
884 by RNA-seq using Integrative Genomics Viewer. Dashed box indicates the position of alternative  
885 splicing events: ES (*AT5G14180*, *AT4G12680*), IR (*AT1G77800*) and A3SS in (*AT2G02390*).  
886 Primers used for qRT-PCR are shown. **(D, F, H and J)** Validation by qRT-PCR. The elongation  
887 factor EF1 $\alpha$  was used as endogenous control.

888 **Figure 6.** Germination analysis and relative expression of *ABI3* and *SOMNUS* in *drt111-2* seeds. **A**)  
889 Expression of *ABI3* splicing variants (*ABI3*- $\alpha$ , *ABI3*- $\beta$ ) in Col-0 and *drt111-2* dry seeds (left) or  
890 imbibed seeds (right). **B**) Germination of freshly harvested seeds sown on media containing 0, 5, 10  
891 or 15 $\mu$ M ABA. **C**) Germination of seeds sown on GM medium after different periods of dry  
892 storage: 0, 4 or 8 weeks after harvest. **(B,C)** Data were collected after 3 days and reported as means  
893 of three biological replicates ( $\pm$ SD). **D**) Germination of 14 d after-ripened seeds sown on medium  
894 containing ABA 0.5  $\mu$ M. Data were collected after 3 days and reported as means of two  
895 independent experiments ( $\pm$ SE). **E**) Germination of freshly harvested seeds sown on medium  
896 containing different concentrations of ABA (0; 5; 10 $\mu$ M). Data were collected after 7 days and  
897 reported as means of three biological replicates ( $\pm$ SD). **F**) Expression of *SOMNUS* in Col-0 and  
898 *drt111-2* imbibed seeds. In all germination tests, seeds were stratified for 2 d before incubation at  
899 24°C. The asterisks indicate significant differences compared with wild type or *abi3-5* (**E**)  
900 according to Student's t-test (\*P  $\leq$  0.05, \*\*P  $\leq$  0.01, \*\*\*P  $\leq$  0.001, \*\*\*\*P  $\leq$  0.0001).

901

902

903

904

**A**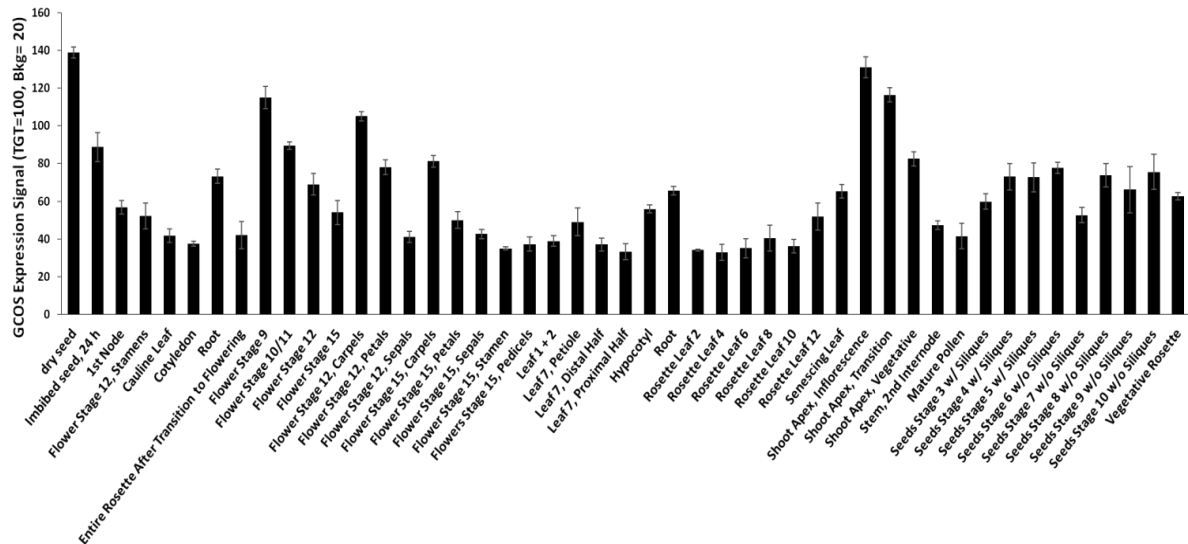**B**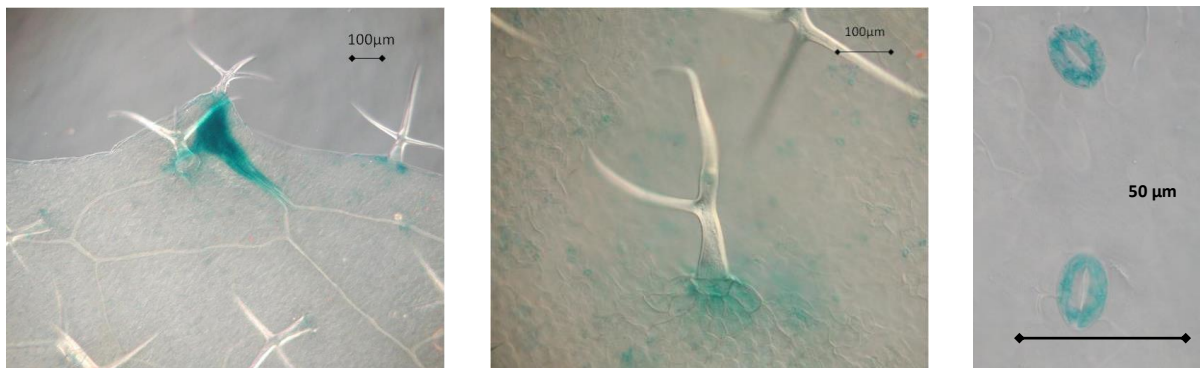**C**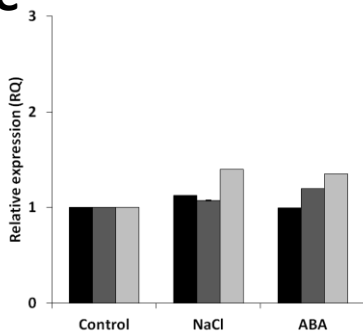**D**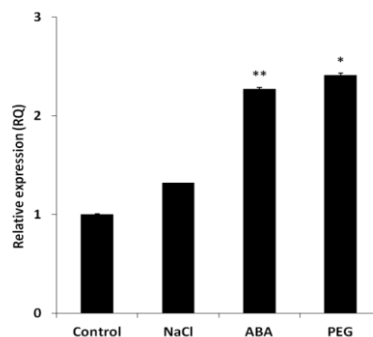

**Figure 1.** *DRT111* promoter activity and gene expression. **(A)** *DRT111* tissue-specific expression based on *Arabidopsis* microarray data in the eFP browser (<http://bar.utoronto.ca>). Data are normalized by the GCOS method, TGT value of 100. **(B)** Histochemical localization of GUS in leaves of transgenic *Arabidopsis* adult plants expressing the GUS reporter gene driven by *DRT111* promoter (*DRT111*promoter::*GUS*). Scale bars are shown. **(C)** Relative expression of *DRT111* in 7-day-old seedlings after 3, 6 and 9 h exposure to NaCl (120 mM) or ABA (50 µM) **(D)** Relative expression of *DRT111* in 7-day-old seedlings after 5 days exposure to NaCl (120 mM), ABA (10 µM) or polyethylene glycol (PEG; 35% W/V). Data were normalized using RNA from untreated seedlings, and the elongation factor *EF1a* as endogenous control. Data reported are means  $\pm$ SD of three biological replicates. The asterisks indicate significant differences compared to control condition according to Student's t-test (\* $P \leq 0.05$ , \*\* $P \leq 0.01$ ).

**A**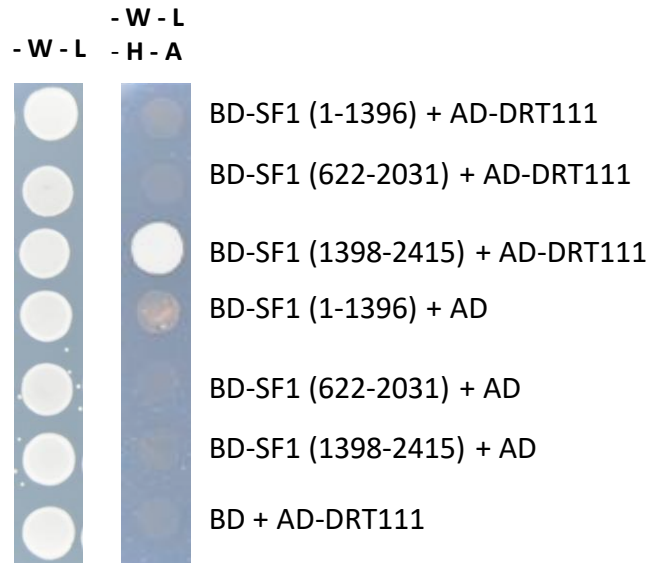**B**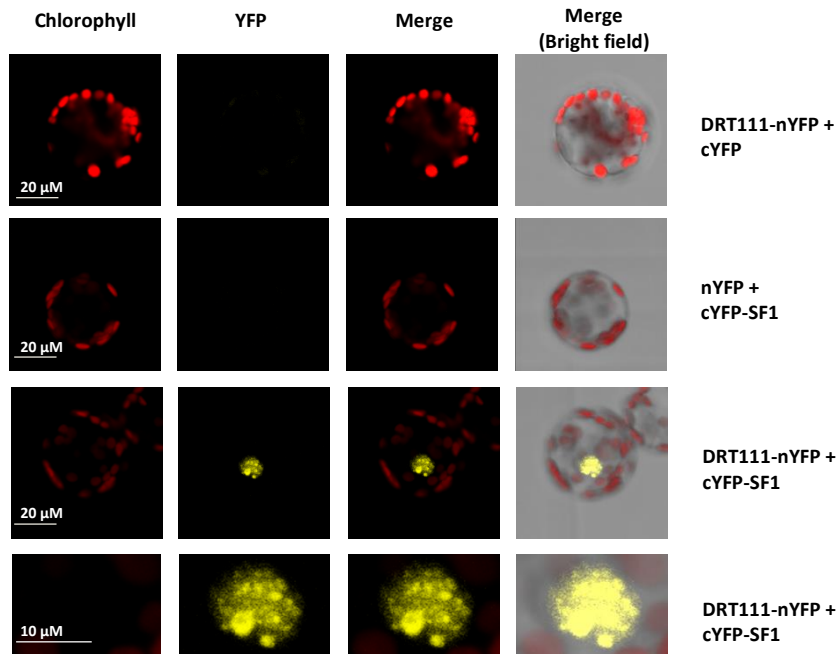

**Figure 2.** Interaction of DRT111 with Splicing Factor 1 (SF1). **(A)** Yeast two-hybrid assay. DRT111 in prey vector (pGADT7, AD domain) was co-transformed with the indicated fragments of SF1 cloned in the bait vector (pGBKT7, BD domain). The empty vectors pGADT7 and pGBKT7 were used as negative controls. Overnight grown yeast culture was dropped onto selective media. Pictures were taken after 3 days incubation at 30°C. **(B)** Bimolecular fluorescence complementation assay. *Nicotiana tabacum* leaf protoplasts were co-transformed with 20 µg each of plasmids encoding DRT111 fused with N-terminus of YFP (nYFP) and SF1 fused with the C-terminus of YFP (cYFP). nYFP and cYFP empty vectors were used as negative controls. The cells were imaged by confocal microscopy 16 h later. For the interaction, zoom in images of the nucleus are shown in the last row. Chlorophyll autofluorescence, YFP fluorescence and merged images are shown. Scales bars are indicated.

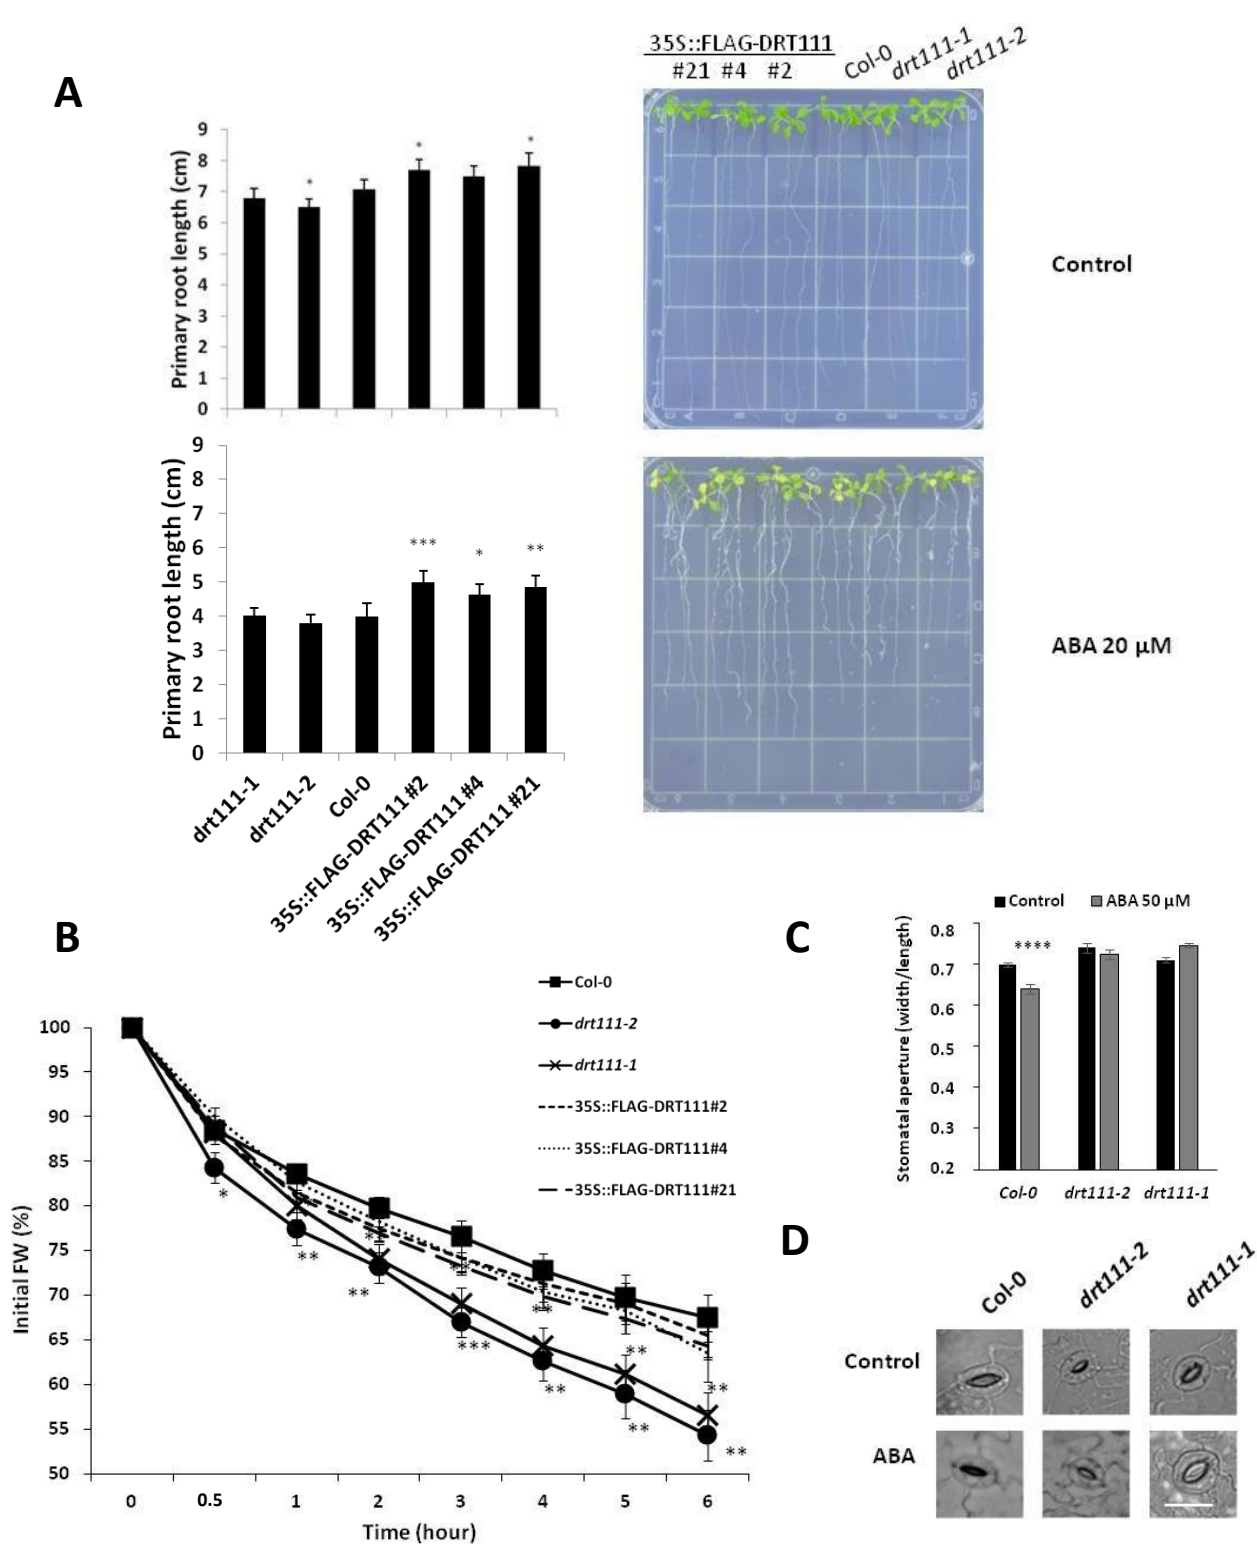

**Figure 3.** Phenotyping of knockout mutants *drt111-1* (GABI\_351E09), *drt111-2* (SALK\_001489) and *DRT111* over-expressing lines (35S::FLAG-DRT111 #2, 4, 21) (A) Primary root length of 10-day-old wild type (Col-0), *DRT111* mutants and transgenic lines grown on GM medium (1% sucrose) or medium containing ABA 20  $\mu$ M. (B) Water loss of detached leaves of *drt111* mutants, overexpressing lines (35S::FLAG-DRT111) and wild type (Col-0) plants. Data are averages  $\pm$  SE of two independent experiments (n=5 for each line, per experiment) and reported as percentages of initial fresh weight at different time points (0.5 to 6 hours). The asterisks indicate significant differences compared with wild type (\* $P$   $\leq$  0.05, \*\* $P$   $\leq$  0.01, \*\*\* $P$   $\leq$  0.001, \*\*\*\* $P$   $\leq$  0.0001, Student's t-test). (C) Stomatal aperture of *drt111-1* and *drt111-2* mutants and wild type plants in response to ABA. Leaf peels harvested from 2-week-old plants were incubated for 2 hours in SOS buffer under light and then treated with or without 50 $\mu$ M ABA for 2.5 hours. Asterisks indicate significant difference between sample with or without ABA (\*\*  $P$   $\leq$  0.01; Student's t-test). (D) Photographs of stomata of the indicated genotypes as reported in C. Scale bar: 25  $\mu$ m.

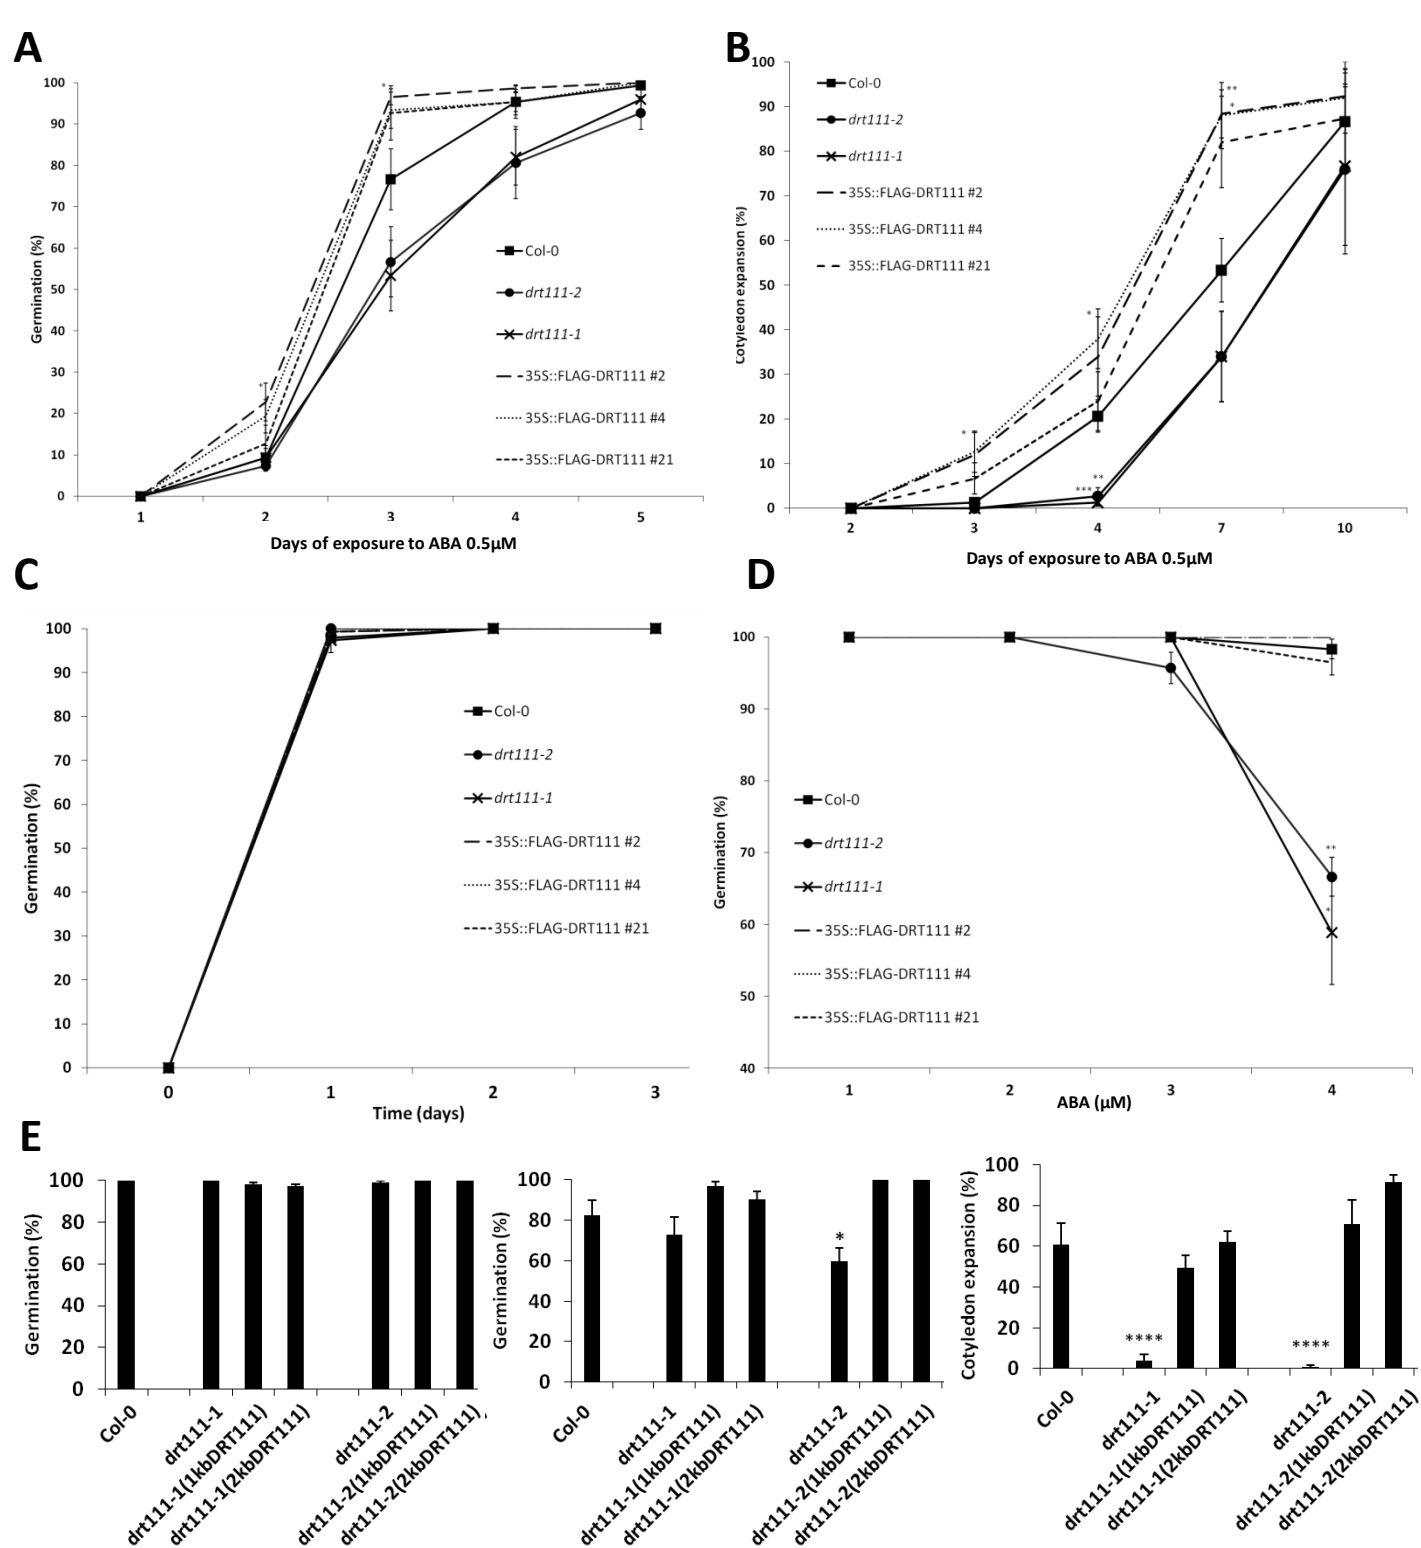

**Figure 4.** Germination analysis of *drt111* mutants (*drt111-1*, *drt111-2*), *DRT111* over-expressing lines (35S::FLAG-DRT111 #2, #4, #21), and wild-type (Col-0) and complementation of *drt111* mutants with pDRT111:DRT111-FLAG (A-C) Germination percentage of 10 days after-ripened seeds scored in terms of radicle emergence (A) and cotyledon expansion (B) in presence of 0.5 μM ABA and control media (C). Data are means ±SD (n=150) of five biological replicates. D) Germination percentage of 1 year after-ripened seeds scored in terms of radicle emergence after 3 day in the presence of different concentration of ABA. E) Germination analysis of *drt111* mutants transformed with *DRT111* genomic fragment including 1kb or 2kb upstream of the translation start site (1kbDRT111; 2kbDRT111) in pDRT111:DRT111-FLAG constructs. Germination reported as percentage in terms of radicle emergence in control condition (left) and in the presence of 0.5 μM ABA (middle) and in terms of cotyledon expansion in presence of 0.5 μM ABA (right). In all germination tests, seeds were stratified for 2 d before incubation at 24°C. The asterisks indicate significant differences compared to Col-0 according to Student's t-test (\*P ≤ 0.05, \*\*P ≤ 0.01, \*\*\*P ≤ 0.001, \*\*\*\*P ≤ 0.0001).

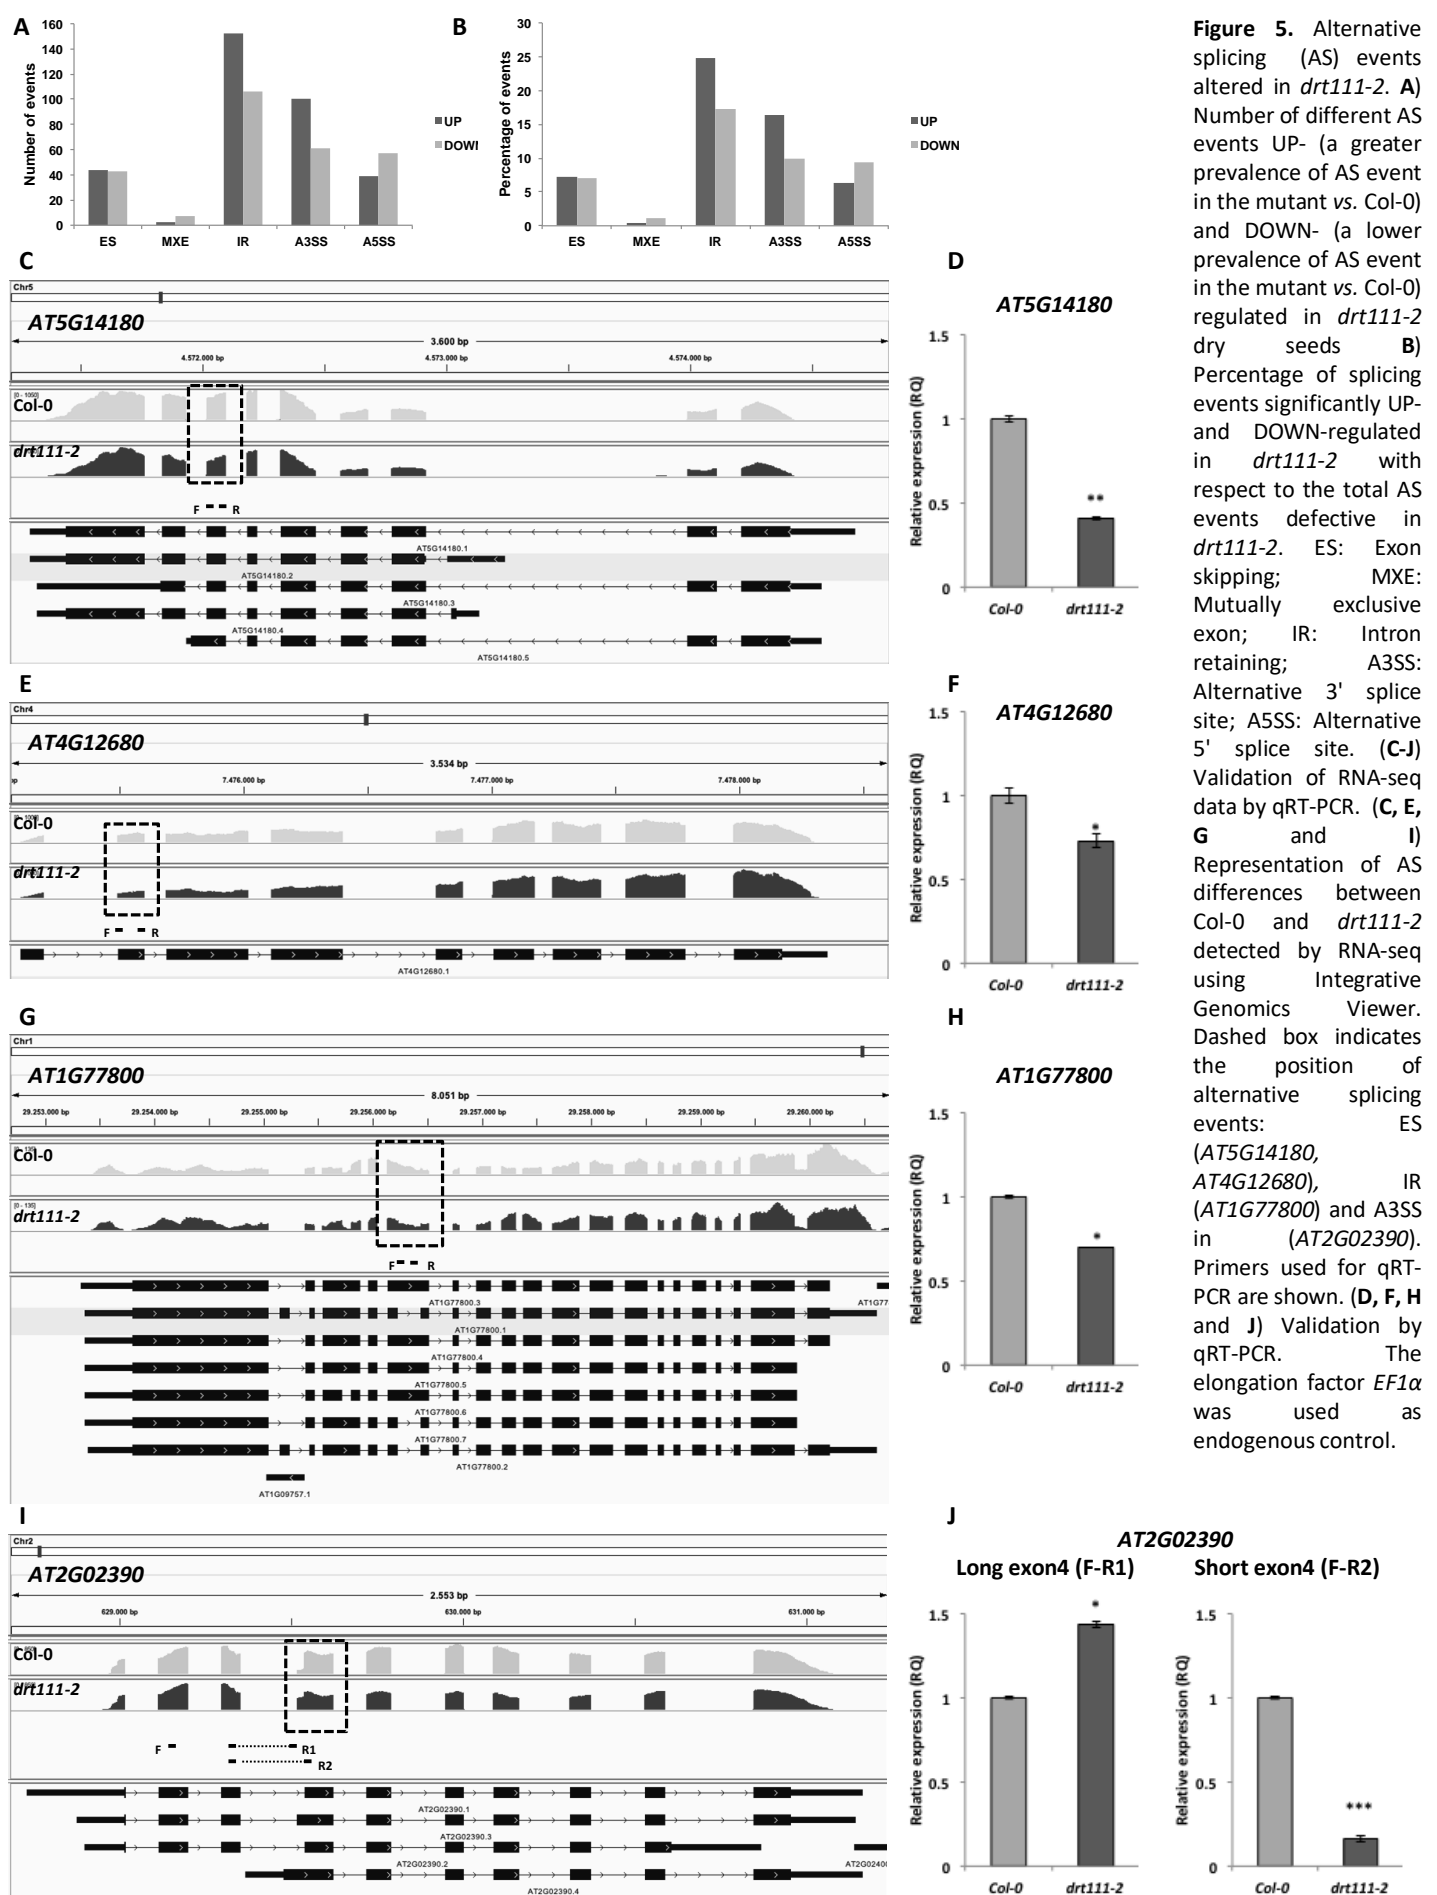



**A**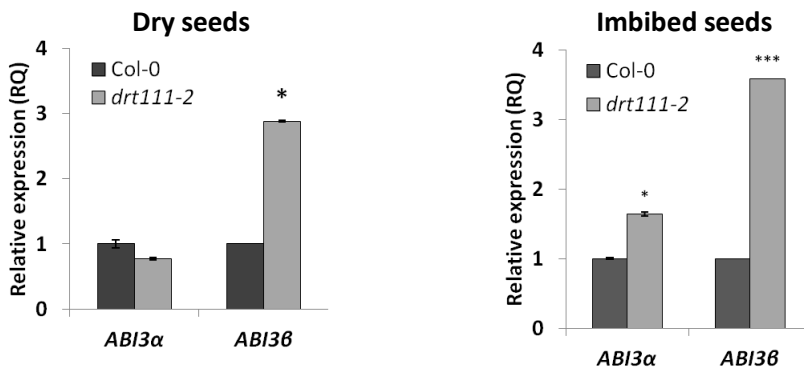**B**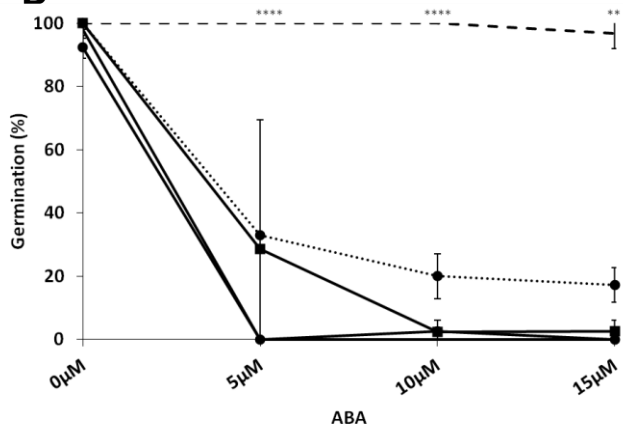**C**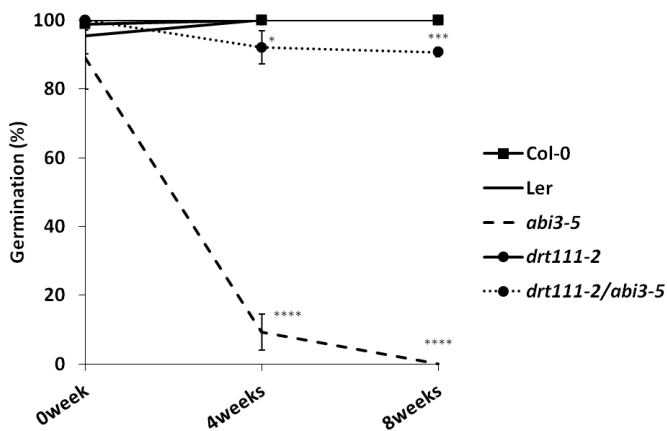**D**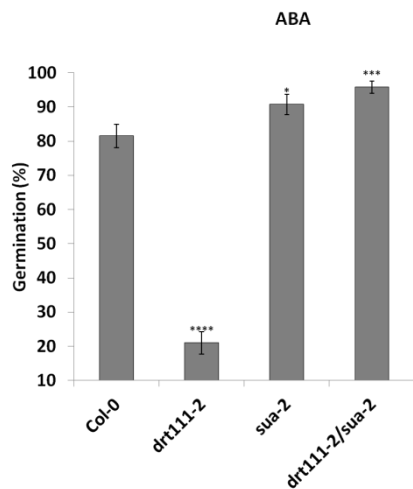**E**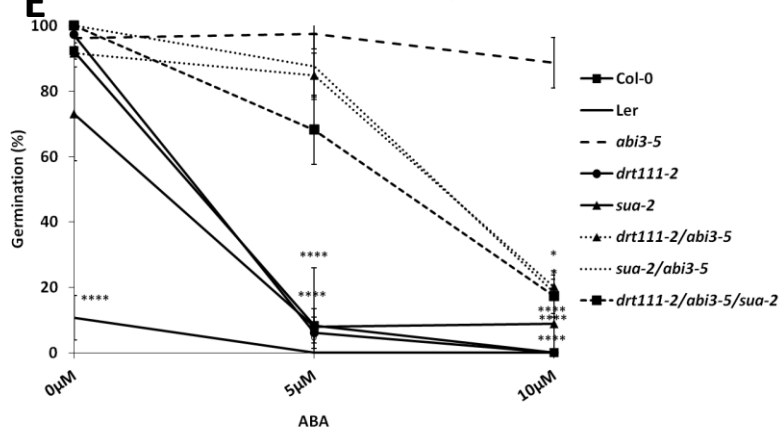**F**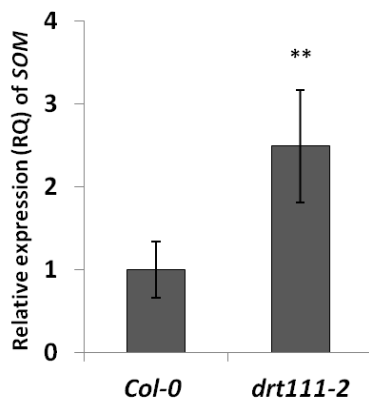

**Figure 6.** Germination analysis and relative expression of *ABI3* and *SOMNUS* in *drt111-2* seeds. **A**) Expression of *ABI3* splicing variants (*ABI3-α*, *ABI3-β*) in Col-0 and *drt111-2* dry seeds (left) or imbibed seeds (right). **B**) Germination of freshly harvested seeds sown on media containing 0, 5, 10 or 15 μM ABA. **C**) Germination of seeds sown on GM medium after different periods of dry storage: 0, 4 or 8 weeks after harvest. (**B,C**) Data were collected after 3 days and reported as means of three biological replicates (±SD). **D**) Germination of 14 d after-ripened seeds sown on medium containing ABA 0.5 μM. Data were collected after 3 days and reported as means of two independent experiments (±SE). **E**) Germination of freshly harvested seeds sown on medium containing different concentrations of ABA (0; 5; 10 μM). Data were collected after 7 days and reported as means of three biological replicates (±SD). **F**) Expression of *SOMNUS* in Col-0 and *drt111-2* imbibed seeds. In all germination tests, seeds were stratified for 2 d before incubation at 24°C. The asterisks indicate significant differences compared with wild type or *abi3-5* (**E**) according to Student's t-test (\* $P \leq 0.05$ , \*\* $P \leq 0.01$ , \*\*\* $P \leq 0.001$ , \*\*\*\* $P \leq 0.0001$ ).

## Parsed Citations

**Ambrosone, A., Batelli, G., Nurcato, R., Aurilia, V., Punzo, P., Bangarusamy, D.K., Ruberti, I., Sassi, M., Leone, A., Costa, A et al. (2015).** The Arabidopsis RNA-Binding Protein AtRGGGA Regulates Tolerance to Salt and Drought Stress. *Plant Physiology* 168(1):292-306. <https://doi.org/10.1104/pp.114.255802>.

Pubmed: [Author and Title](#)

Google Scholar: [Author Only Title Only Author and Title](#)

**Ambrosone, A., Batelli, G., Bostan, H., D'Agostino, N., Chiusano, M.L., Perrotta, G., Leone, A., Grillo, S., Costa, A (2017).** Distinct gene networks drive differential response to abrupt or gradual water deficit in potato. *Gene*, 597, 30–39. <https://doi.org/10.1016/J.GENE.2016.10.024>

Pubmed: [Author and Title](#)

Google Scholar: [Author Only Title Only Author and Title](#)

**Arce, A L., Raineri, J., Capella, M., Cabello, J. V, & Chan, R. L. (2011).** Uncharacterized conserved motifs outside the HD-Zip domain in HD-Zip subfamily I transcription factors; a potential source of functional diversity. *BMC Plant Biology*, 11(1), 42. <https://doi.org/10.1186/1471-2229-11-42>

Pubmed: [Author and Title](#)

Google Scholar: [Author Only Title Only Author and Title](#)

**Bai, C., and Elledge, S. J. (1996).** [27] Gene identification using the yeast two-hybrid system. *Methods in Enzymology*, 273, 331–347. [https://doi.org/10.1016/S0076-6879\(96\)73029-X](https://doi.org/10.1016/S0076-6879(96)73029-X)

Pubmed: [Author and Title](#)

Google Scholar: [Author Only Title Only Author and Title](#)

**Batelli, G., Massarelli, I., Van Oosten, M., Nurcato, R., Vannini, C., Raimondi, G., Leone, A., Zhu, J.K., Maggio, A., Grillo, S. (2012).** Asg1 is a stress-inducible gene which increases stomatal resistance in salt stressed potato. *Journal of Plant Physiology*, 169(18), 1849–1857. <https://doi.org/10.1016/J.JPLPH.2012.07.004>

Pubmed: [Author and Title](#)

Google Scholar: [Author Only Title Only Author and Title](#)

**Bauer, H., Ache, P., Wohlfart, F., Al-Rasheid, K. A., Sonnewald, S., Sonnewald, U., Kneitzd, S., Hetherington, A.M., and Hedrich, R. (2013).** How do stomata sense reductions in atmospheric relative humidity?. *Molecular Plant*, 6(5), 1703-1706.

Pubmed: [Author and Title](#)

Google Scholar: [Author Only Title Only Author and Title](#)

**Bies-Etheve, N., da Silva Conceicao, A., Giraudat, J., Koornneef, M., Léon-Kloosterziel, K., Valon, C., Delseny, M. (1999).** Importance of the B2 domain of the Arabidopsis ABI3 protein for Em and 2S albumin gene regulation. *Plant Molecular Biology*, 40(6), 1045–1054. <https://doi.org/10.1023/A:1006252512202>

Pubmed: [Author and Title](#)

Google Scholar: [Author Only Title Only Author and Title](#)

**Capella M., Ribone P.A., Arce A.L., Chan R.L. (2015)** Arabidopsis thaliana HomeoBox 1 (AtHB1), a Homeodomain-Leucine Zipper I (HD-Zip I) transcription factor, is regulated by PHYTOCHROME-INTERACTING FACTOR 1 to promote hypocotyl elongation. *New Phytologist* 207(3):669-82. . <https://doi.org/10.1111/nph.13401>.

Pubmed: [Author and Title](#)

Google Scholar: [Author Only Title Only Author and Title](#)

**Carrasco-López, C., Hernández-Verdeja, T., Perea-Resa, C., Abia, D., Catalá, R., Salinas, J. (2017).** Environment-dependent regulation of spliceosome activity by the LSM2-8 complex in Arabidopsis. *Nucleic Acids Research*, 45(12), 7416–7431. <https://doi.org/10.1093/nar/gkx375>

Pubmed: [Author and Title](#)

Google Scholar: [Author Only Title Only Author and Title](#)

**Carvalho, R.F., Carvalho S.D., Duque P. (2010).** The Plant-Specific SR45 Protein Negatively Regulates Glucose and ABA Signaling during Early Seedling Development in Arabidopsis *Plant Physiology* 154(2): 772–783. <https://doi.org/10.1104/pp.10.155523>

Pubmed: [Author and Title](#)

Google Scholar: [Author Only Title Only Author and Title](#)

**Chong, G.L., M.H., Lin, W.-D., Wong, M.M., Verslues P.E. (2019)** Highly ABA-Induced 1 (HA1)-Interacting protein HIN1 and drought acclimation-enhanced splicing efficiency at intron retention sites *PNAS* 116 (44): 22376–22385. <https://doi.org/10.1073/pnas.1906244116>

Pubmed: [Author and Title](#)

Google Scholar: [Author Only Title Only Author and Title](#)

**Clough, S. J., Bent, A. F. (1998).** Floral dip: a simplified method for *Agrobacterium*-mediated transformation of *Arabidopsis thaliana*. *The Plant Journal*, 16(6), 735–743. <https://doi.org/10.1046/j.1365-3113x.1998.00343.x>

Pubmed: [Author and Title](#)

Google Scholar: [Author Only Title Only Author and Title](#)

**Crisci, A., Raleff, F., Bagdiul, I., Raabe, M., Urlaub, H., Rain, J.-C., Krämer, A. (2015).** Mammalian splicing factor SF1 interacts with SURP domains of U2 snRNP-associated proteins. *Nucleic Acids Research*, 43(21), gkv952. <https://doi.org/10.1093/nar/gkv952>

Pubmed: [Author and Title](#)

Google Scholar: [Author Only Title Only Author and Title](#)

- Cui, P., Zhang, S., Ding, F., Ali, S., Xiong, L. (2014). Dynamic regulation of genome-wide pre-mRNA splicing and stress tolerance by the Sm-like protein LSM5 in Arabidopsis. *Genome Biology*, 15(1), R1. <https://doi.org/10.1186/gb-2014-15-1-r1>  
Pubmed: [Author and Title](#)  
Google Scholar: [Author Only Title Only Author and Title](#)
- Curtis M.D., Grossniklaus U. (2003) A gateway cloning vector set for high-throughput functional analysis of genes in planta. *Plant Physiology* 133:462–9. <https://doi.org/10.1104/pp.103.027979>  
Pubmed: [Author and Title](#)  
Google Scholar: [Author Only Title Only Author and Title](#)
- de Wit, M., Galvão, V. C., Fankhauser, C. (2016). Light-Mediated Hormonal Regulation of Plant Growth and Development. *Annual Review of Plant Biology*, 67(1), 513–537. <https://doi.org/10.1146/annurev-arplant-043015-112252>  
Pubmed: [Author and Title](#)  
Google Scholar: [Author Only Title Only Author and Title](#)
- Dobin, A., Davis, C.A., Schlesinger, F., Drenkow, J., Zaleski, C., Jha, S., Batut, P., Chaisson, M. and Gingeras, T.R., (2013). STAR: ultrafast universal RNA-seq aligner. *Bioinformatics*, 29(1), pp.15-21.  
Pubmed: [Author and Title](#)  
Google Scholar: [Author Only Title Only Author and Title](#)
- Earley, K. W., Haag, J. R., Pontes, O., Opper, K., Juehne, T., Song, K., Pikaard, C. S. (2006). Gateway-compatible vectors for plant functional genomics and proteomics. *The Plant Journal*, 45(4), 616–629. <https://doi.org/10.1111/j.1365-313X.2005.02617.x>  
Pubmed: [Author and Title](#)  
Google Scholar: [Author Only Title Only Author and Title](#)
- Finch-Savage, W. E., Leubner-Metzger, G. (2006). Seed dormancy and the control of germination. *New Phytologist*, 171(3), 501–523. <https://doi.org/10.1111/j.1469-8137.2006.01787.x>  
Pubmed: [Author and Title](#)  
Google Scholar: [Author Only Title Only Author and Title](#)
- Fu, X.-D., Ares, M. (2014). Context-dependent control of alternative splicing by RNA-binding proteins. *Nature Reviews Genetics*, 15(10), 689–701. <https://doi.org/10.1038/nrg3778>  
Pubmed: [Author and Title](#)  
Google Scholar: [Author Only Title Only Author and Title](#)
- Gonzalez, C.V. Ibarra S.E., Piccoli P.N., Botto, J.F., Boccacchio HE. (2012) Phytochrome B increases drought tolerance by enhancing ABA sensitivity in Arabidopsis thaliana. *Plant Cell Environment* 35(11):1958-68. <https://doi.org/10.1111/j.1365-3040.2012.02529.x>  
Pubmed: [Author and Title](#)  
Google Scholar: [Author Only Title Only Author and Title](#)
- Hegele, A., Kamburov, A., Grossmann, A., Sourlis, C., Wowro, S., Weimann, M., Will, C.L., Pena, V., Lührmann, R., Stelzl, U. (2012). Dynamic Protein-Protein Interaction Wiring of the Human Spliceosome. *Molecular Cell*, 45(4), 567–580. <https://doi.org/10.1016/J.MOLCEL.2011.12.034>  
Pubmed: [Author and Title](#)  
Google Scholar: [Author Only Title Only Author and Title](#)
- Hetherington, A M., Woodward, F. I. (2003). The role of stomata in sensing and driving environmental change. *Nature*, 424(6951), 901-908.  
Pubmed: [Author and Title](#)  
Google Scholar: [Author Only Title Only Author and Title](#)
- Hugouvieux, V., Kwak, J. M., Schroeder, J. I. (2001). An mRNA Cap Binding Protein, ABH1, Modulates Early Abscisic Acid Signal Transduction in Arabidopsis. *Cell*, 106(4), 477–487. [https://doi.org/10.1016/S0092-8674\(01\)00460-3](https://doi.org/10.1016/S0092-8674(01)00460-3)  
Pubmed: [Author and Title](#)  
Google Scholar: [Author Only Title Only Author and Title](#)
- Jang, Y.H., Park, H.Y., Lee, K.C., Thu, M.P., Kim, S.K., Suh, M.C., Kang, H., Kim, J.K. (2014). A homolog of splicing factor SF1 is essential for development and is involved in the alternative splicing of pre-mRNA in Arabidopsis thaliana. *The Plant Journal*, 78(4), 591–603. <https://doi.org/10.1111/tpj.12491>  
Pubmed: [Author and Title](#)  
Google Scholar: [Author Only Title Only Author and Title](#)
- Johannesson, H., Wang, Y., Hanson, J., Engström, P. (2003). The Arabidopsis thaliana homeobox gene ATHB5 is a potential regulator of abscisic acid responsiveness in developing seedlings. *Plant Molecular Biology*, 51(5), 719–729. <https://doi.org/10.1023/A:1022567625228>  
Pubmed: [Author and Title](#)  
Google Scholar: [Author Only Title Only Author and Title](#)
- Kim, D.H., Yamaguchi, S., Lim, S., Oh, E., Park, J., Hanada, A., Kamaya, Y., Choi, G. (2008). SOMNUS, a CCCH-Type Zinc Finger Protein in Arabidopsis, Negatively Regulates Light-Dependent Seed Germination Downstream of PIL5. *The Plant Cell*. (20)5: 1260–1277. <https://doi.org/10.1105/tpc.108.058859>  
Pubmed: [Author and Title](#)  
Google Scholar: [Author Only Title Only Author and Title](#)
- Kim, J., Kang, H., Park, J., Kim, W., Yoo, J., Lee, N., Kim, J., Yoon, T.Y., Choi, G. (2016). PIF1-Interacting Transcription Factors and Their

**Binding Sequence Elements Determine the in Vivo Targeting Sites of PIF1. The Plant Cell. (28) 6: 1388–1405**  
<https://doi.org/10.1105/tpc.16.00125>

Pubmed: [Author and Title](#)

Google Scholar: [Author Only Title Only Author and Title](#)

**Kuromori, T., Seo, M., Shinozaki, K. (2018). ABA transport and plant water stress responses. Trends in plant science, 23(6), pp.513-522.**  
doi: 10.1016/j.tplants.2018.04.001. Epub 2018 May 3.

Pubmed: [Author and Title](#)

Google Scholar: [Author Only Title Only Author and Title](#)

**Lallena, M. J., Chalmers, K. J., Llamazares, S., Lamond, A. I., Valcárcel, J. (2002). Splicing Regulation at the Second Catalytic Step by Sex-lethal Involves 3' Splice Site Recognition by SPF45. Cell, 109(3), 285–296. [https://doi.org/10.1016/S0092-8674\(02\)00730-4](https://doi.org/10.1016/S0092-8674(02)00730-4)**

Pubmed: [Author and Title](#)

Google Scholar: [Author Only Title Only Author and Title](#)

**Laloum, T., Martín, G., Duque, P. (2018). Alternative Splicing Control of Abiotic Stress Responses. Trends in Plant Science, 23(2), 140–150. <https://doi.org/10.1016/J.TPLANTS.2017.09.019>**

Pubmed: [Author and Title](#)

Google Scholar: [Author Only Title Only Author and Title](#)

**Lau, O. S., Deng, X. W. (2010). Plant hormone signaling lightens up: integrators of light and hormones. Current Opinion in Plant Biology, 13(5), 571–577. <https://doi.org/10.1016/J.PBI.2010.07.001>**

Pubmed: [Author and Title](#)

Google Scholar: [Author Only Title Only Author and Title](#)

**Lee, K. C., Jang, Y. H., Kim, S.-K., Park, H.-Y., Thu, M. P., Lee, J. H., Kim, J.-K. (2017). RRM domain of Arabidopsis splicing factor SF1 is important for pre-mRNA splicing of a specific set of genes. Plant Cell Reports, 36(7), 1083–1095. <https://doi.org/10.1007/s00299-017-2140-1>**

Pubmed: [Author and Title](#)

Google Scholar: [Author Only Title Only Author and Title](#)

**Lee, K.P., Piskurewicz, U., Turečková, V., Carat, S., Chappuis, R., Strnad, M., Fankhauser, C., Lopez-Molina, L. (2012). Spatially and genetically distinct control of seed germination by phytochromes A and B. Genes & Development, 26(17), 1984–1996. <https://doi.org/10.1101/gad.194266.112>**

Pubmed: [Author and Title](#)

Google Scholar: [Author Only Title Only Author and Title](#)

**Liao, Y., Smyth, G.K. and Shi, W., (2013). featureCounts: an efficient general purpose program for assigning sequence reads to genomic features. Bioinformatics, 30(7), pp.923-930.**

Pubmed: [Author and Title](#)

Google Scholar: [Author Only Title Only Author and Title](#)

**Livak, K. J., Schmittgen, T. D. (2001). Analysis of Relative Gene Expression Data Using Real-Time Quantitative PCR and the 2- $\Delta\Delta CT$  Method. Methods, 25(4), 402–408. <https://doi.org/10.1006/METH.2001.1262>**

Pubmed: [Author and Title](#)

Google Scholar: [Author Only Title Only Author and Title](#)

**Manz, B., Müller, K., Kucera, B., Volke, F., Leubner-Metzger, G. (2005). Water uptake and distribution in germinating tobacco seeds investigated in vivo by nuclear magnetic resonance imaging. Plant Physiology, 138(3), 1538–1551. <https://doi.org/10.1104/pp.105.061663>**

Pubmed: [Author and Title](#)

Google Scholar: [Author Only Title Only Author and Title](#)

**Marquez, Y., Höpfner, M., Ayatollahi, Z., Barta, A., Kalyana, M. (2015). Unmasking alternative splicing inside protein-coding exons defines exons and their role in proteome plasticity. Genome research, 25(7), 995-1007.**

Pubmed: [Author and Title](#)

Google Scholar: [Author Only Title Only Author and Title](#)

**Mönke, G., Seifert, M., Keilwagen, J., Mohr, M., Grosse, I., Hähnel, U., Junker, A., Weisshaar, B., Conrad, U., Bäumlein, H., et al. (2012). Toward the identification and regulation of the Arabidopsis thaliana ABI3 regulon. Nucleic Acids Research, 40(17), 8240–8254. <https://doi.org/10.1093/nar/gks594>**

Pubmed: [Author and Title](#)

Google Scholar: [Author Only Title Only Author and Title](#)

**Nambara E, Marion-Poll A. (2005) Abscisic acid biosynthesis and catabolism. Annu Rev Plant Biol. (56),165-85.**

Pubmed: [Author and Title](#)

Google Scholar: [Author Only Title Only Author and Title](#)

**Nakagawa, T., Kurose, T., Hino, T., Tanaka, K., Kawamukai, M., Niwa, Y., Toyooka, K., Matsuoka, K., Jinbo, T., Kimura, T. (2007). Development of series of gateway binary vectors, pGWBs, for realizing efficient construction of fusion genes for plant transformation. J. Biosciences and Bioengineering. 104, 34–41. doi: 10.1263/jbb.104.34**

Pubmed: [Author and Title](#)

Google Scholar: [Author Only Title Only Author and Title](#)

**Nilsen, T. W., Graveley, B. R. (2010). Expansion of the eukaryotic proteome by alternative splicing. Nature, 463(7280), 457–463.**

<https://doi.org/10.1038/nature08909>

Pubmed: [Author and Title](#)

Google Scholar: [Author Only Title Only Author and Title](#)

Oh, E., Kang, H., Yamaguchi, S., Park, J., Lee, D., Kamiya, Y., Choi, G. (2009). Genome-wide analysis of genes targeted by PHYTOCHROME INTERACTING FACTOR 3-LIKE5 during seed germination in *Arabidopsis*. *The Plant Cell*, 21(2), 403–419. <https://doi.org/10.1105/tpc.108.064691>

Pubmed: [Author and Title](#)

Google Scholar: [Author Only Title Only Author and Title](#)

Oh, E., Yamaguchi, S., Hu, J., Yusuke, J., Jung, B., Paik, I., Lee, H.S., Sun, T.P., Kamiya, Y., Choi, G. (2007). PIL5, a phytochrome-interacting bHLH protein, regulates gibberellin responsiveness by binding directly to the GAI and RGA promoters in *Arabidopsis* seeds. *Plant Cell* 19:1192–208. <https://doi.org/10.1105/tpc.107.050153>

Pubmed: [Author and Title](#)

Google Scholar: [Author Only Title Only Author and Title](#)

Oñate-Sánchez, L., Vicente-Carbajosa, J. (2008). DNA-free RNA isolation protocols for *Arabidopsis thaliana*, including seeds and siliques. *BMC Research Notes*, 1(1), 93. <https://doi.org/10.1186/1756-0500-1-93>

Pubmed: [Author and Title](#)

Google Scholar: [Author Only Title Only Author and Title](#)

Ooms, J., Leon-Kloosterziel, K. M., Bartels, D., Koornneef, M., Karssen, C. M. (1993). Acquisition of Desiccation Tolerance and Longevity in Seeds of *Arabidopsis thaliana* (A Comparative Study Using Abscisic Acid-Insensitive *abi3* Mutants). *Plant Physiology*, 102(4), 1185–1191. <https://doi.org/10.1104/pp.102.4.1185>

Pubmed: [Author and Title](#)

Google Scholar: [Author Only Title Only Author and Title](#)

Paik, I., Kathare, P. K., Kim, J.-I., Huq, E. (2017). Expanding Roles of PIFs in Signal Integration from Multiple Processes. *Molecular Plant*, 10(8), 1035–1046. <https://doi.org/10.1016/J.MOLP.2017.07.002>

Pubmed: [Author and Title](#)

Google Scholar: [Author Only Title Only Author and Title](#)

Pang, Q., Hays, J. B., Rajagopal, I. (1993). Two cDNAs from the plant *Arabidopsis thaliana* that partially restore recombination proficiency and DNA-damage resistance to *E.coli* mutants lacking recombination-intermediate-resolution activities. *Nucleic Acids Research*, 21(7), 1647–1653. <https://doi.org/10.1093/nar/21.7.1647>

Pubmed: [Author and Title](#)

Google Scholar: [Author Only Title Only Author and Title](#)

Parcy, F., Valon, C., Raynal, M., Gaubier-Comella, P., Delseny, M., Giraudat, J. (1994). Regulation of gene expression programs during *Arabidopsis* seed development: roles of the *ABI3* locus and of endogenous abscisic acid. *The Plant Cell*, 6(11), 1567–1582. <https://doi.org/10.1105/tpc.6.11.1567>

Pubmed: [Author and Title](#)

Google Scholar: [Author Only Title Only Author and Title](#)

Park, H.-Y., Lee, K. C., Jang, Y. H., Kim, S.-K., Thu, M. P., Lee, J. H., Kim, J.-K. (2017). The *Arabidopsis* splicing factors, *AtU2AF65*, *AtU2AF35*, and *AtSF1* shuttle between nuclei and cytoplasm. *Plant Cell Reports*, 36(7), 1113–1123. <https://doi.org/10.1007/s00299-017-2142-z>

Pubmed: [Author and Title](#)

Google Scholar: [Author Only Title Only Author and Title](#)

Park, J., Lee, N., Kim, W., Lim, S., Choi, G. (2011). *ABI3* and *PIL5* Collaboratively Activate the Expression of *SOMNUS* by Directly Binding to Its Promoter in Imbibed *Arabidopsis* Seeds. *The Plant Cell*, 23(4), 1404–1415. <https://doi.org/10.1105/TPC.110.080721>

Pubmed: [Author and Title](#)

Google Scholar: [Author Only Title Only Author and Title](#)

Pedrazzini, E., Giovinazzo, G., Bielli, A., de Virgilio, M., Frigerio, L., Pesca, M., Faoro, F., Bollini, R., Ceriotti, A., Vitale, A. (1997). Protein quality control along the route to the plant vacuole. *The Plant Cell* (9): 1869–1880. <https://doi.org/10.1105/tpc.9.10.1869>

Pubmed: [Author and Title](#)

Google Scholar: [Author Only Title Only Author and Title](#)

Penfield, S., Josse, E.-M., Halliday, K. J. (2010). A role for an alternative splice variant of *PIF6* in the control of *Arabidopsis* primary seed dormancy. *Plant Molecular Biology*, 73(1–2), 89–95. <https://doi.org/10.1007/s11103-009-9571-1>

Pubmed: [Author and Title](#)

Google Scholar: [Author Only Title Only Author and Title](#)

Perruc, E., Kinoshita, N., Lopez-Molina, L. (2007). The role of chromatin-remodeling factor *PKL* in balancing osmotic stress responses during *Arabidopsis* seed germination. *The Plant Journal*, 52(5), 927–936. <https://doi.org/10.1111/j.1365-313X.2007.03288.x>

Pubmed: [Author and Title](#)

Google Scholar: [Author Only Title Only Author and Title](#)

Punzo, P., Ruggiero, A., Possenti, M., Nurcato, R., Costa, A., Morelli, G., Grillo, S., Batelli, G. (2018). The PP2A-interactor *TIP41* modulates *ABA* responses in *Arabidopsis thaliana*. *The Plant Journal*, 94(6), 991–1009. <https://doi.org/10.1111/tpj.13913>

Pubmed: [Author and Title](#)

Google Scholar: [Author Only Title Only Author and Title](#)

**Qin, X., and Zeevaert, J. A. (1999).** The 9-cis-epoxycarotenoid cleavage reaction is the key regulatory step of abscisic acid biosynthesis in water-stressed bean. *Proceedings of the National Academy of sciences*, 96(26), 15354–15361. <https://doi.org/10.1073/pnas.96.26.15354>

Pubmed: [Author and Title](#)

Google Scholar: [Author Only Title Only Author and Title](#)

**Rau, A, Gallopin, M., Celeux, G. and Jaffrézic, F., (2013).** Data-based filtering for replicated high-throughput transcriptome sequencing experiments. *Bioinformatics*, 29(17), pp.2146-2152.

Pubmed: [Author and Title](#)

Google Scholar: [Author Only Title Only Author and Title](#)

**Robinson, M.D., McCarthy, D.J. and Smyth, G.K., (2010).** edgeR: a Bioconductor package for differential expression analysis of digital gene expression data. *Bioinformatics*, 26(1), pp.139-140.

Pubmed: [Author and Title](#)

Google Scholar: [Author Only Title Only Author and Title](#)

**Ruggiero, A, Landi, S., Punzo, P., Possenti, M., Van Oosten, M.J., Costa, A., Morelli, G., Maggio, A, Grillo, S. and Batelli, G., (2019).** Salinity and ABA Seed Responses in Pepper: Expression and Interaction of ABA Core Signaling Components. *Frontiers in plant science*, 10, p.304.

Pubmed: [Author and Title](#)

Google Scholar: [Author Only Title Only Author and Title](#)

**Santos-Mendoza, M., Dubreucq, B., Baud, S., Parcy, F., Caboche, M., Lepiniec, L. (2008)** Deciphering gene regulatory networks that control seed development and maturation in Arabidopsis. *The Plant Journal* (54) 4: 608–620. <https://doi.org/10.1111/j.1365-313X.2008.03461.x>.

Pubmed: [Author and Title](#)

Google Scholar: [Author Only Title Only Author and Title](#)

**Schroeder, J. I., Kwak, J. M., Allen, G. J. (2001).** Guard cell abscisic acid signalling and engineering drought hardiness in plants. *Nature*, 410(6826), 327–330. <https://doi.org/10.1038/35066500>

Pubmed: [Author and Title](#)

Google Scholar: [Author Only Title Only Author and Title](#)

**Sessa, G., Carabelli, M., Possenti, M., Morelli, G., Ruberti, I. (2018).** Multiple Links between HD-Zip Proteins and Hormone Networks. *International Journal of Molecular Sciences*, 19(12), 4047. <https://doi.org/10.3390/ijms19124047>

Pubmed: [Author and Title](#)

Google Scholar: [Author Only Title Only Author and Title](#)

**Shen, S., Park, J.W., Lu, Z.X., Lin, L., Henry, M.D., Wu, Y.N., Zhou, Q. and Xing, Y., (2014).** rMATS: robust and flexible detection of differential alternative splicing from replicate RNA-Seq data. *Proceedings of the National Academy of Sciences*, 111(51), pp.E5593-E5601.

Pubmed: [Author and Title](#)

Google Scholar: [Author Only Title Only Author and Title](#)

**Staiger, D., Brown, J. W. S. (2013).** Alternative Splicing at the Intersection of Biological Timing, Development, and Stress Responses *The Plant Cell*. (25) 10:3640-56. <https://doi.org/10.1105/tpc.113.113803>

Pubmed: [Author and Title](#)

Google Scholar: [Author Only Title Only Author and Title](#)

**Sugliani, M., Brambilla, V., Clercx, E. J. M., Koornneef, M., Soppe, W. J. J. (2010).** The Conserved Splicing Factor SUA Controls Alternative Splicing of the Developmental Regulator ABI3 in Arabidopsis. *The Plant Cell*, 22(6), 1936–1946. <https://doi.org/10.1105/TPC.110.074674>

Pubmed: [Author and Title](#)

Google Scholar: [Author Only Title Only Author and Title](#)

**Tian, T., Liu, Y., Yan, H., You, Q., Yi, X., Du, Z., Xu, W. and Su, Z., (2017).** agriGO v2. 0: a GO analysis toolkit for the agricultural community, 2017 update. *Nucleic acids research*, 45(W1), pp.W122-W129.

Pubmed: [Author and Title](#)

Google Scholar: [Author Only Title Only Author and Title](#)

**Vaistij, F.E., Barros-Galvão, T., Cole, A.F., Gilday, A.D., He, Z., Li, Y., Harvey, D., Larson, T.R., Graham, I.A. (2018).** MOTHER-OF-FT-AND-TFL1 represses seed germination under far-red light by modulating phytohormone responses in Arabidopsis thaliana. *Proceedings of the National Academy of Sciences*, 115(33), 8442–8447. <https://doi.org/10.1073/PNAS.1806460115>

Pubmed: [Author and Title](#)

Google Scholar: [Author Only Title Only Author and Title](#)

**Valdés, A. E., Övernäs, E., Johansson, H., Rada-Iglesias, A., Engström, P. (2012).** The homeodomain-leucine zipper (HD-Zip) class I transcription factors ATHB7 and ATHB12 modulate abscisic acid signalling by regulating protein phosphatase 2C and abscisic acid receptor gene activities. *Plant Molecular Biology*, 80(4–5), 405–418. <https://doi.org/10.1007/s11103-012-9956-4>

Pubmed: [Author and Title](#)

Google Scholar: [Author Only Title Only Author and Title](#)

**Verslues, P. E., Agarwal, M., Katiyar-Agarwal, S., Zhu, J., Zhu, J.-K. (2006).** Methods and concepts in quantifying resistance to drought, salt and freezing, abiotic stresses that affect plant water status. *The Plant Journal*, 45(4), 523–539. <https://doi.org/10.1111/j.1365-313X.2005.02593.x>

Pubmed: [Author and Title](#)

Google Scholar: [Author Only Title Only Author and Title](#)

**Wang P., Du Y., Hou Y.J., Zhao Y., Hsu C.C., Yuan F., Zhu X., Tao WA, Song C.P., Zhu JK.(2015). Nitric oxide negatively regulates abscisic acid signaling in guard cells by S-nitrosylation of OST1 Proceedings of the National Academy of Sciences, (112) 2:613-8. <https://doi.org/10.1073/pnas.1423481112>**

Pubmed: [Author and Title](#)

Google Scholar: [Author Only Title Only Author and Title](#)

**Winter, D., Vinegar, B., Nahal, H., Ammar, R., Wilson, G. V., Provar, N. J. (2007). An "Electronic Fluorescent Pictograph" Browser for Exploring and Analyzing Large-Scale Biological Data Sets. PLoS ONE, 2(8), e718. <https://doi.org/10.1371/journal.pone.0000718>**

Pubmed: [Author and Title](#)

Google Scholar: [Author Only Title Only Author and Title](#)

**Xin, R., Kathare, P. K., Huq, E. (2019). Coordinated regulation of pre-mRNA splicing by the SFPS-RRC1 complex to promote photomorphogenesis. The Plant Cell, tpc.00786.2018. <https://doi.org/10.1105/tpc.18.00786>**

Pubmed: [Author and Title](#)

Google Scholar: [Author Only Title Only Author and Title](#)

**Xin, R., Zhu, L., Salomé, P.A, Mancini, E., Marshall, C.M., Harmon, F.G., Yanovsky, M.J., Weigel, D., Huq, E. (2017). SPF45-related splicing factor for phytochrome signaling promotes photomorphogenesis by regulating pre-mRNA splicing in Arabidopsis. Proceedings of the National Academy of Sciences of the United States of America, (114) 33: E7018–E7027. <https://doi.org/10.1073/pnas.1706379114>**

Pubmed: [Author and Title](#)

Google Scholar: [Author Only Title Only Author and Title](#)

**Xiong, Gong Z, Rock CD, Subramanian S, Guo Y, Xu W, Galbraith D, Zhu JK. (2001) Modulation of abscisic acid signal transduction and biosynthesis by an Sm-like protein in Arabidopsis. Dev Cell. 1:771–781. Doi: 10.1016/S1534-5807(01)00087-9.**

Pubmed: [Author and Title](#)

Google Scholar: [Author Only Title Only Author and Title](#)

**Yan, A, Chen, Z (2017). The pivotal role of abscisic acid signaling during transition from seed maturation to germination. Plant Cell Reports, 36(5), 689–703. <https://doi.org/10.1007/s00299-016-2082-z>**

Pubmed: [Author and Title](#)

Google Scholar: [Author Only Title Only Author and Title](#)

**Yoo, C.Y., Pence H.E., Hasegawa P.M, Mickelbart M.V. (2009) Regulation of Transpiration to Improve Crop Water Use, Critical Reviews in Plant Sciences, 28(6), 410-431, DOI:10.1080/07352680903173175**

Pubmed: [Author and Title](#)

Google Scholar: [Author Only Title Only Author and Title](#)

**Zhang, Z, Liu, Y., Ding, P., Li, Y., Kong, Q., Zhang, Y. (2014). Splicing of Receptor-Like Kinase-Encoding SNC4 and CERK1 is Regulated by Two Conserved Splicing Factors that Are Required for Plant Immunity. Molecular Plant (7) 12:1766-75. doi: 10.1093/mp/ssu103.**

Pubmed: [Author and Title](#)

Google Scholar: [Author Only Title Only Author and Title](#)

**Zhang,Z, Zhang S, Zhang Y, Wang X, Li D, Li Q, Yue M, Li Q, Zhang YE, Xu Y, Xue Y, Chong K, Bao S. (2011) Arabidopsis floral initiator SKB1 confers high salt tolerance by regulating transcription and pre-mRNA splicing through altering histone H4R3 and small nuclear ribonucleoprotein LSM4 methylation. The Plant Cell. (1):396-411. doi:10.1105/tpc.110.081356**

Pubmed: [Author and Title](#)

Google Scholar: [Author Only Title Only Author and Title](#)

**Zhu, F.Y., Chen, M.X., Ye, N.H., Shi, L., Ma, K.L., Yang, J.F., Cao, Y.Y., Zhang, Y., Yoshida, T., Fernie, A.R., et al. (2017). Proteogenomic analysis reveals alternative splicing and translation as part of the abscisic acid response in Arabidopsis seedlings. The Plant Journal, 91(3), 518–533 <https://doi.org/10.1111/tpj.13571>**

Pubmed: [Author and Title](#)

Google Scholar: [Author Only Title Only Author and Title](#)
